# Supplementary material
Source: PubMed Central journal article supplement (PMC2775136)

MRPS9

Sequence

AITYLFPSGLFEK

Phosphosite

Thr109, Tyr110, Ser11

Score m/z

29 865.24

Mr(expt)

1728.47

Mr(calc)

1725.66

Delta

42.81

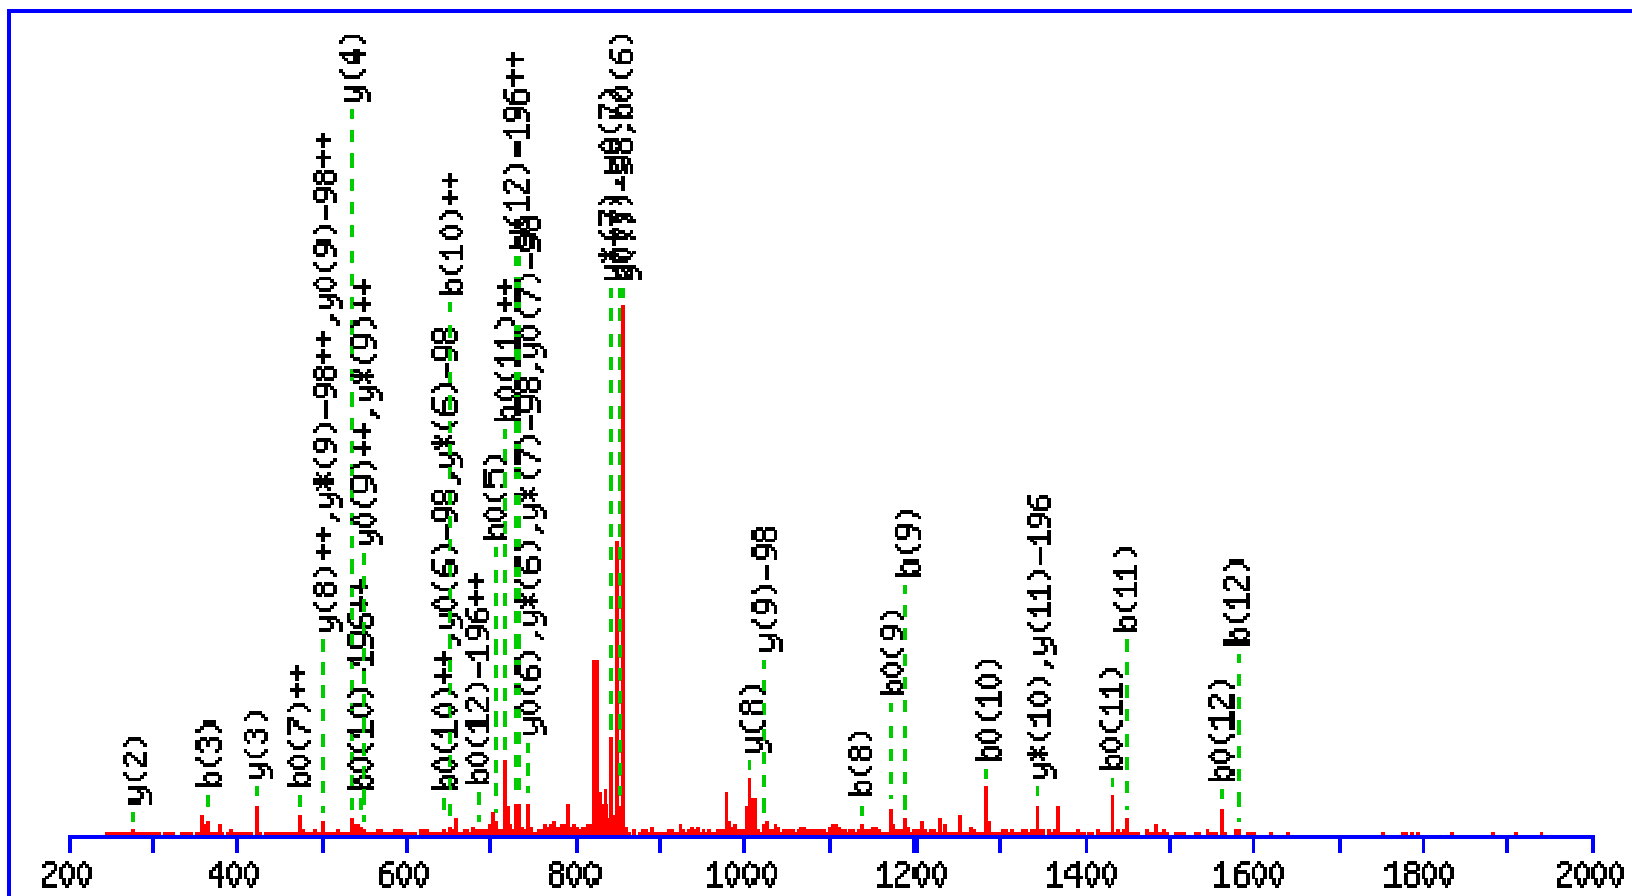

MRPS9

| Sequence        | Phosphosite | Score | m/z    | Mr(expt) | Mr(calc) | Delta |
|-----------------|-------------|-------|--------|----------|----------|-------|
| TANAEAVVYGHGSGK | Thr279      | 47    | 770.93 | 1539.85  | 1540.53  | -0.68 |

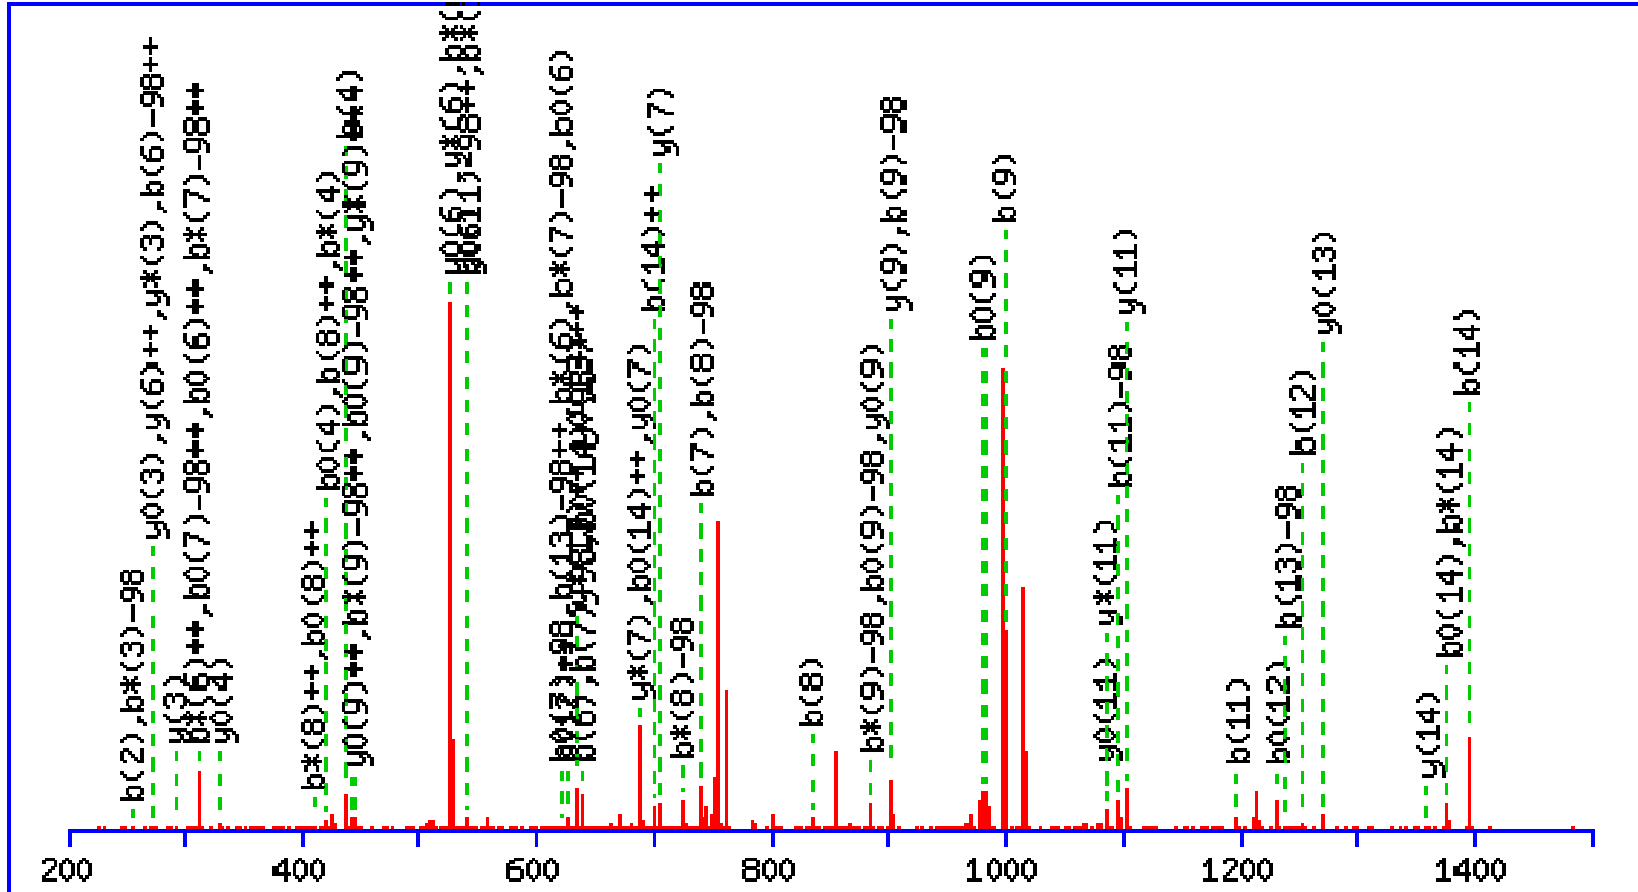

MRPS9

| Sequence      | Phosphosite    | Score | m/z    | Mr(expt) | Mr(calc) | Delta |
|---------------|----------------|-------|--------|----------|----------|-------|
| SSQAGAIRLAMSR | Ser339, Ser349 | 23    | 755.20 | 1508.38  | 1507.50  | 0.88  |

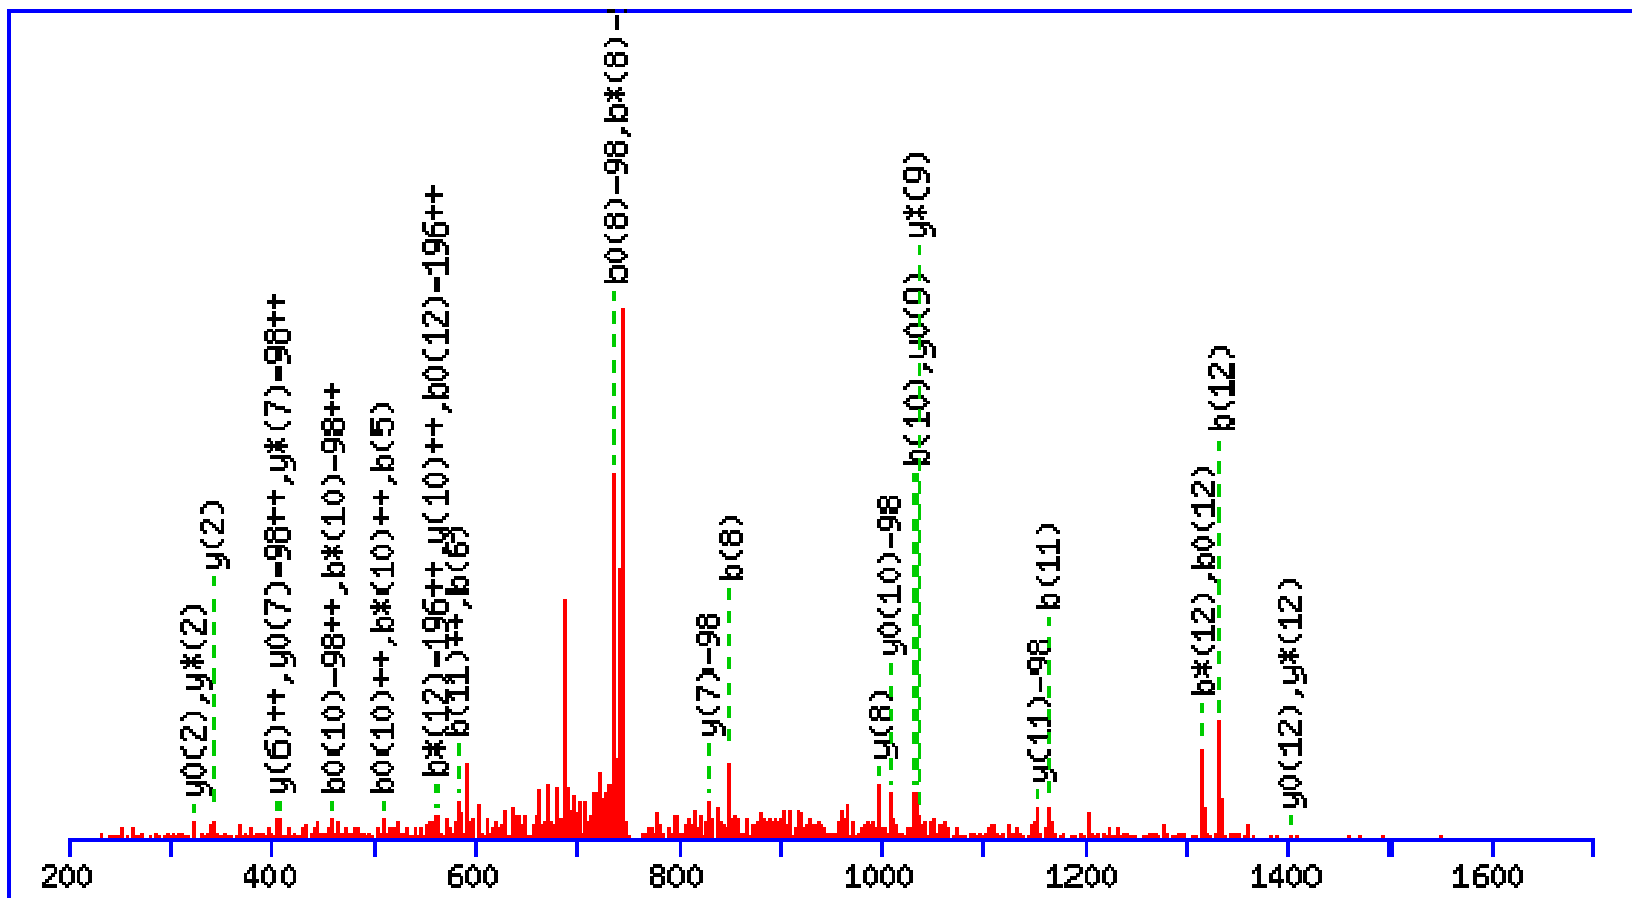

MRPS10

|             |                      |             |       |        |          |          |       |
|-------------|----------------------|-------------|-------|--------|----------|----------|-------|
| Start - End | Sequence             | Phosphosite | Score | m/z    | Mr(expt) | Mr(calc) | Delta |
|             | NDGFLLS <u>T</u> SMK | Ser41       | 42    | 646.42 | 1290.82  | 1292.35  | -1.53 |

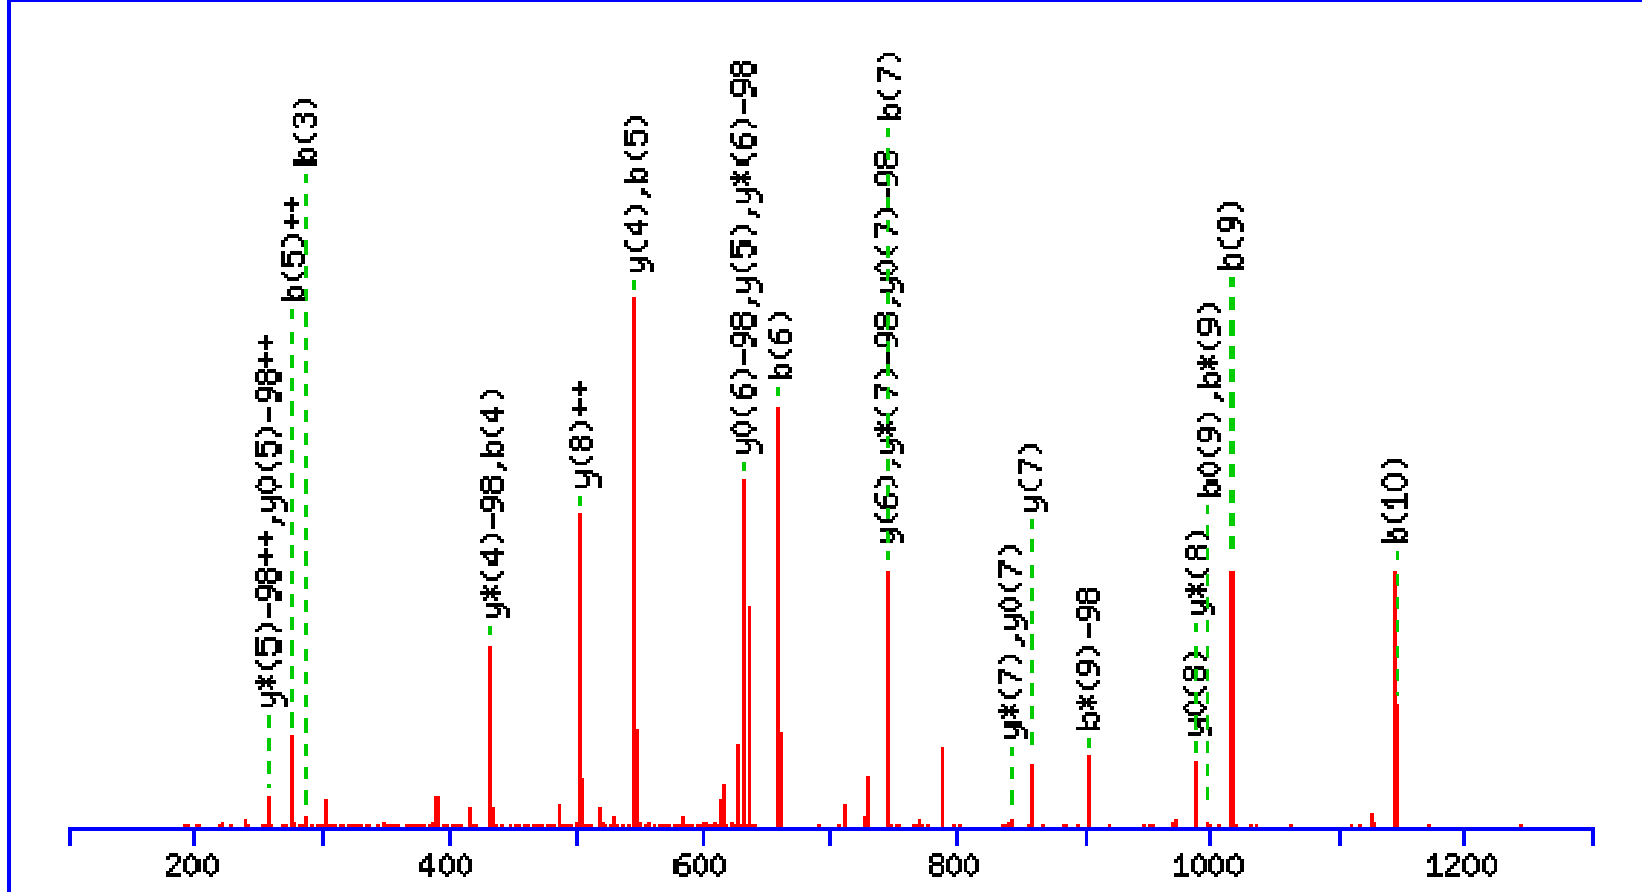

MRPS10

Sequence

CLELEHLTGSTADVLEYIQR

Phosphosite

Thr149

Score m/z

48 1266.75

Mr(expt)

2531.48

Mr(calc)

2533.70

Delta

-2.22

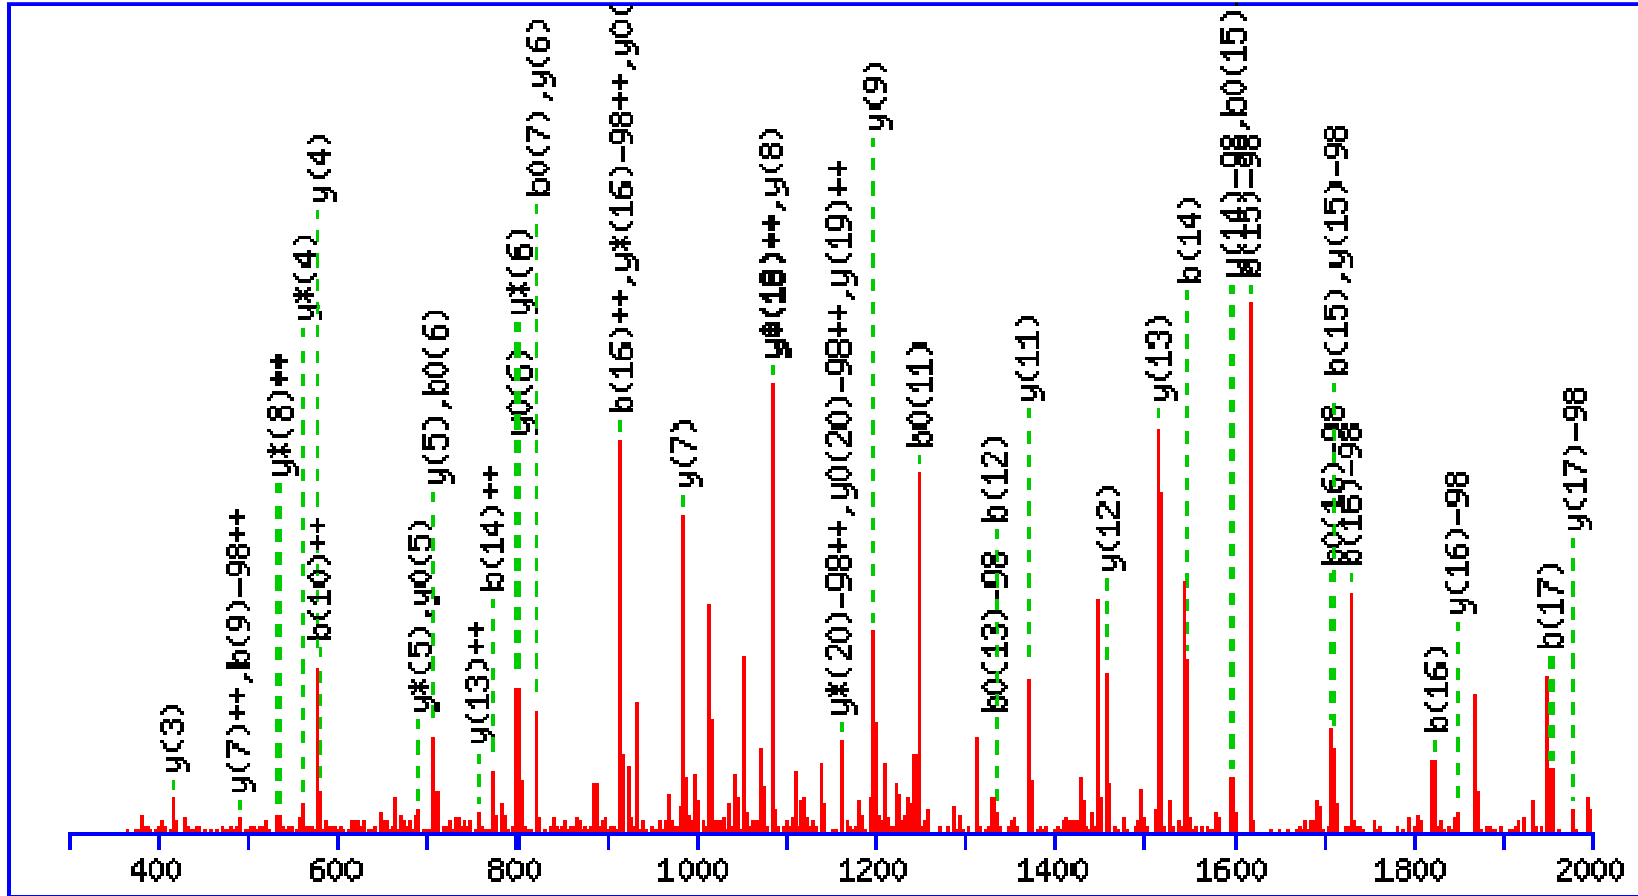

MRPS11

Sequence

ATGKGVTHVR

Phosphosite  
Lys145, Thr148

Score m/z  
29 573.60

Mr(expt)  
1145.18

Mr(calc)  
1147.18

Delta  
-2.00

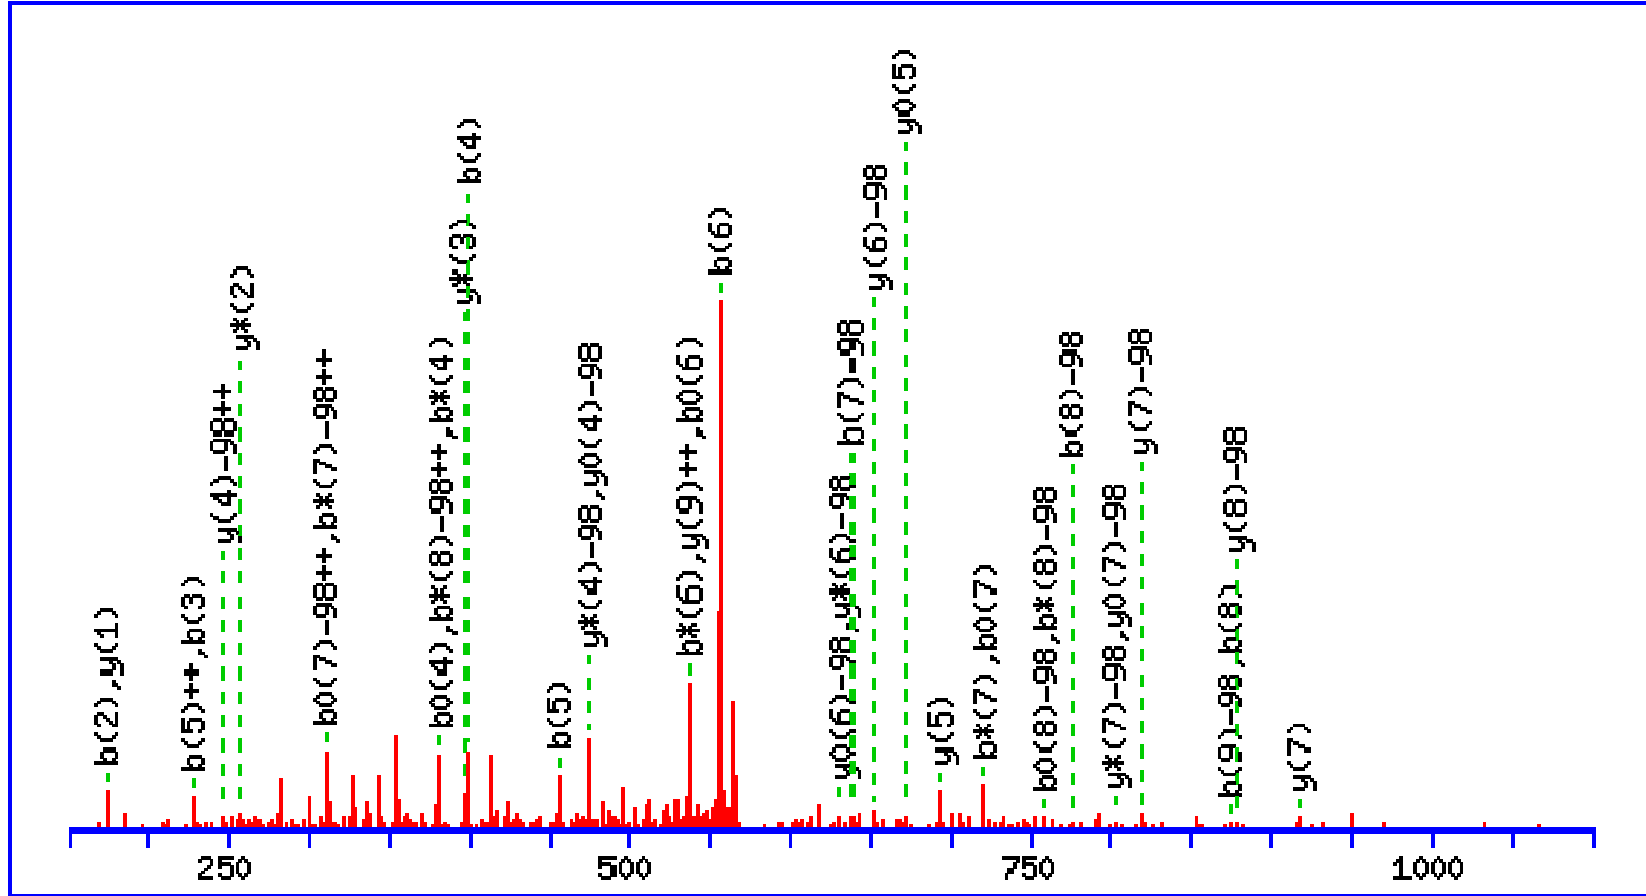

MRPS16

Sequence

AQEVLLAAQKTDTEATETKEN

Phosphosite

Thr125

Score 86  
m/z 1185.97

Mr(expt) 2369.93

Mr(calc) 2370.42

Delta -0.51

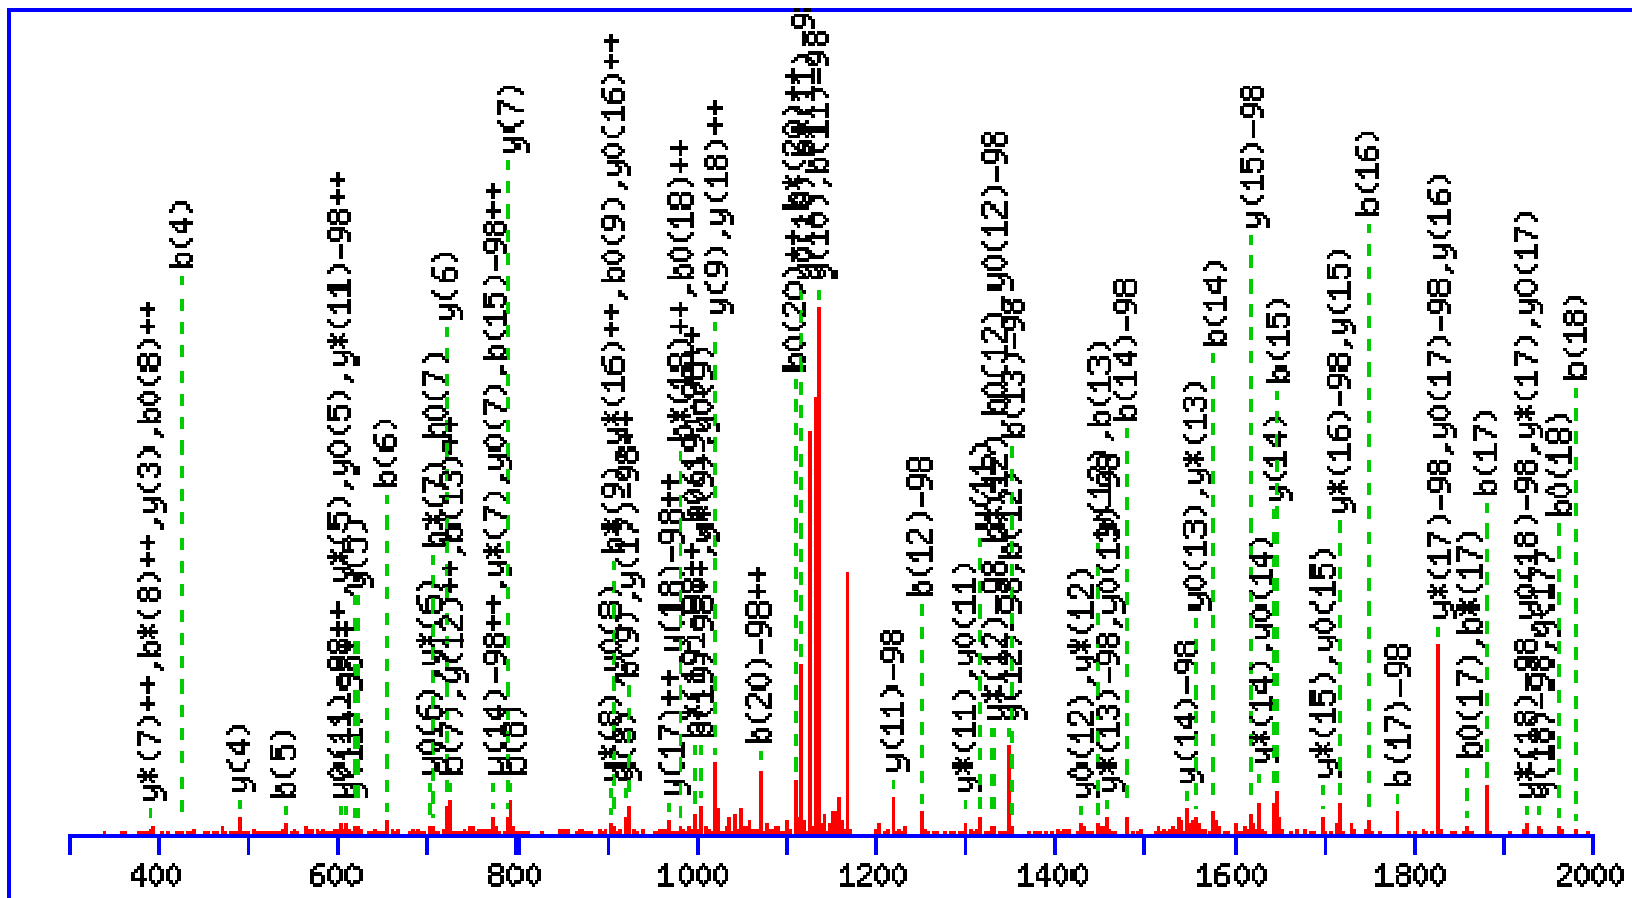

MRPS23

Sequence

TQQEGSQVSR

Phosphosite

Thr145

Score

28 599.65

Mr(expt)

1197.28

Mr(calc)

1199.12

Delta

-1.84

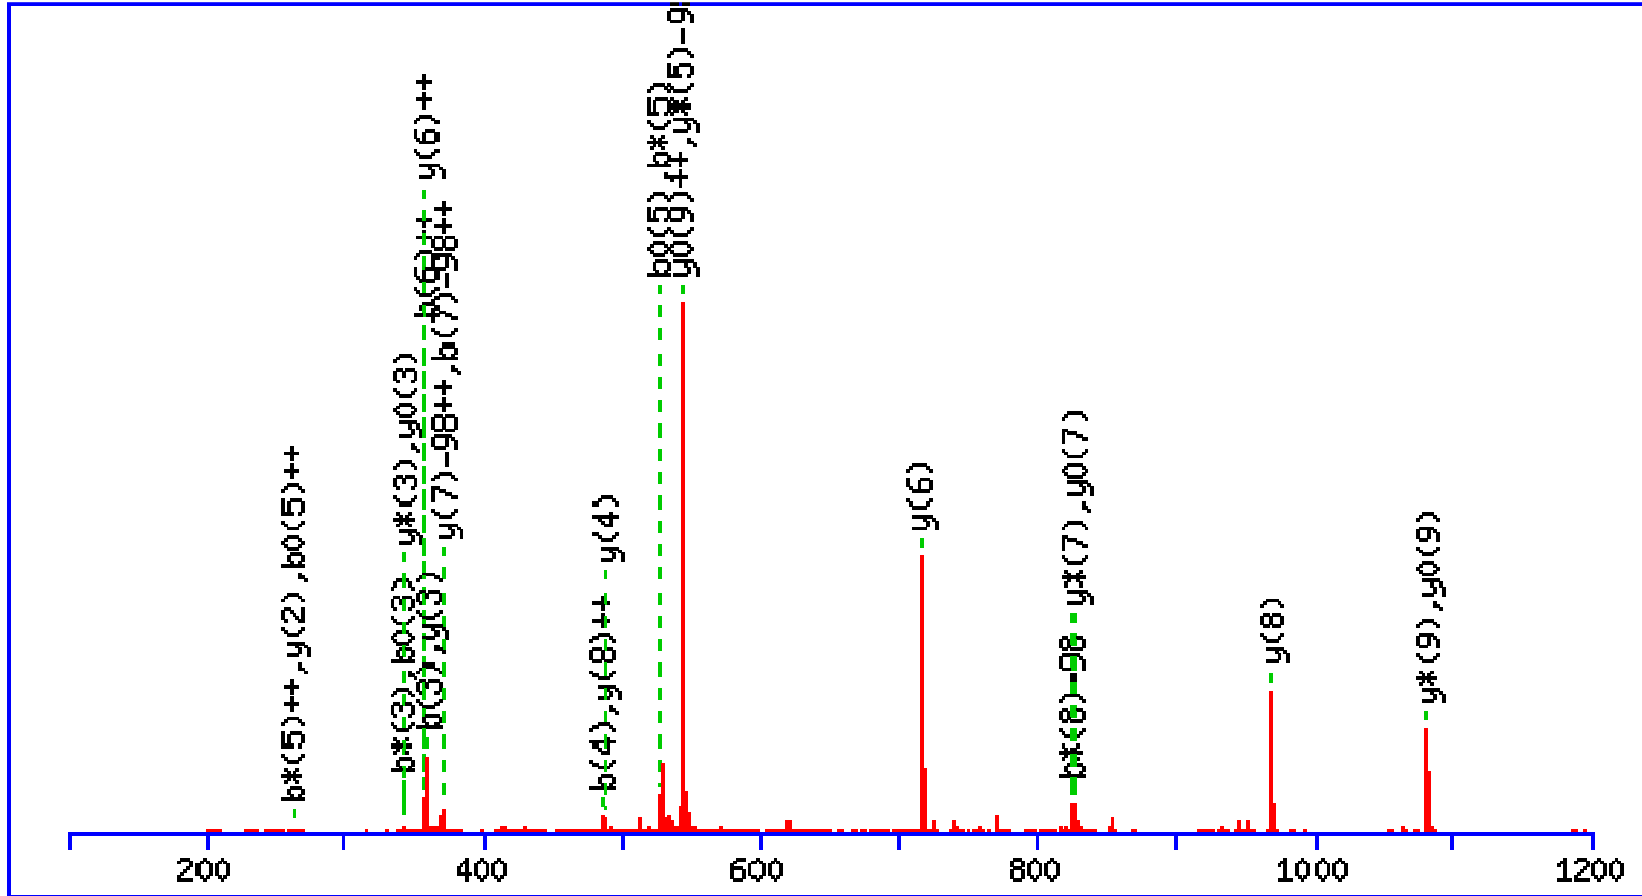



MRPS23

Sequence

SESMGVESQTALEENPPLK

Phosphosite

Ser153

Score m/z

114 1064.68

Mr(expt)

2127.36

Mr(calc)

2126.19

Delta

1.16

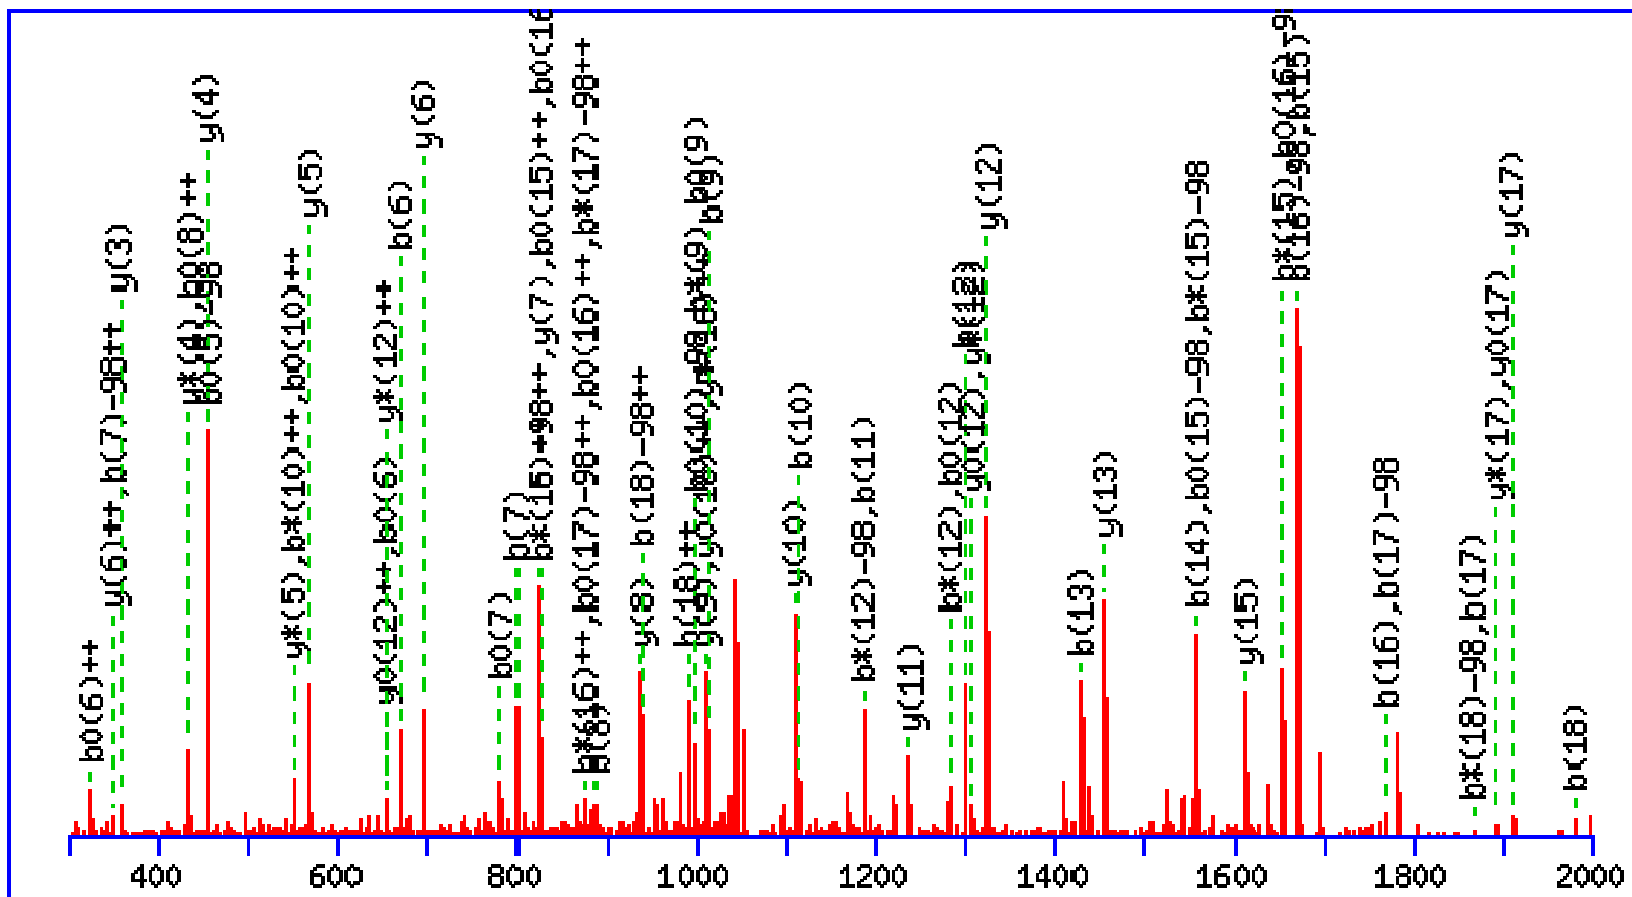

MRPL2

Sequence

YDPCRSADIALVAGGNR

Phosphosite

Tyr132

Score

57 929.93

Mr(expt)

1857.86

Mr(calc)

1857.94

Delta

-0.08

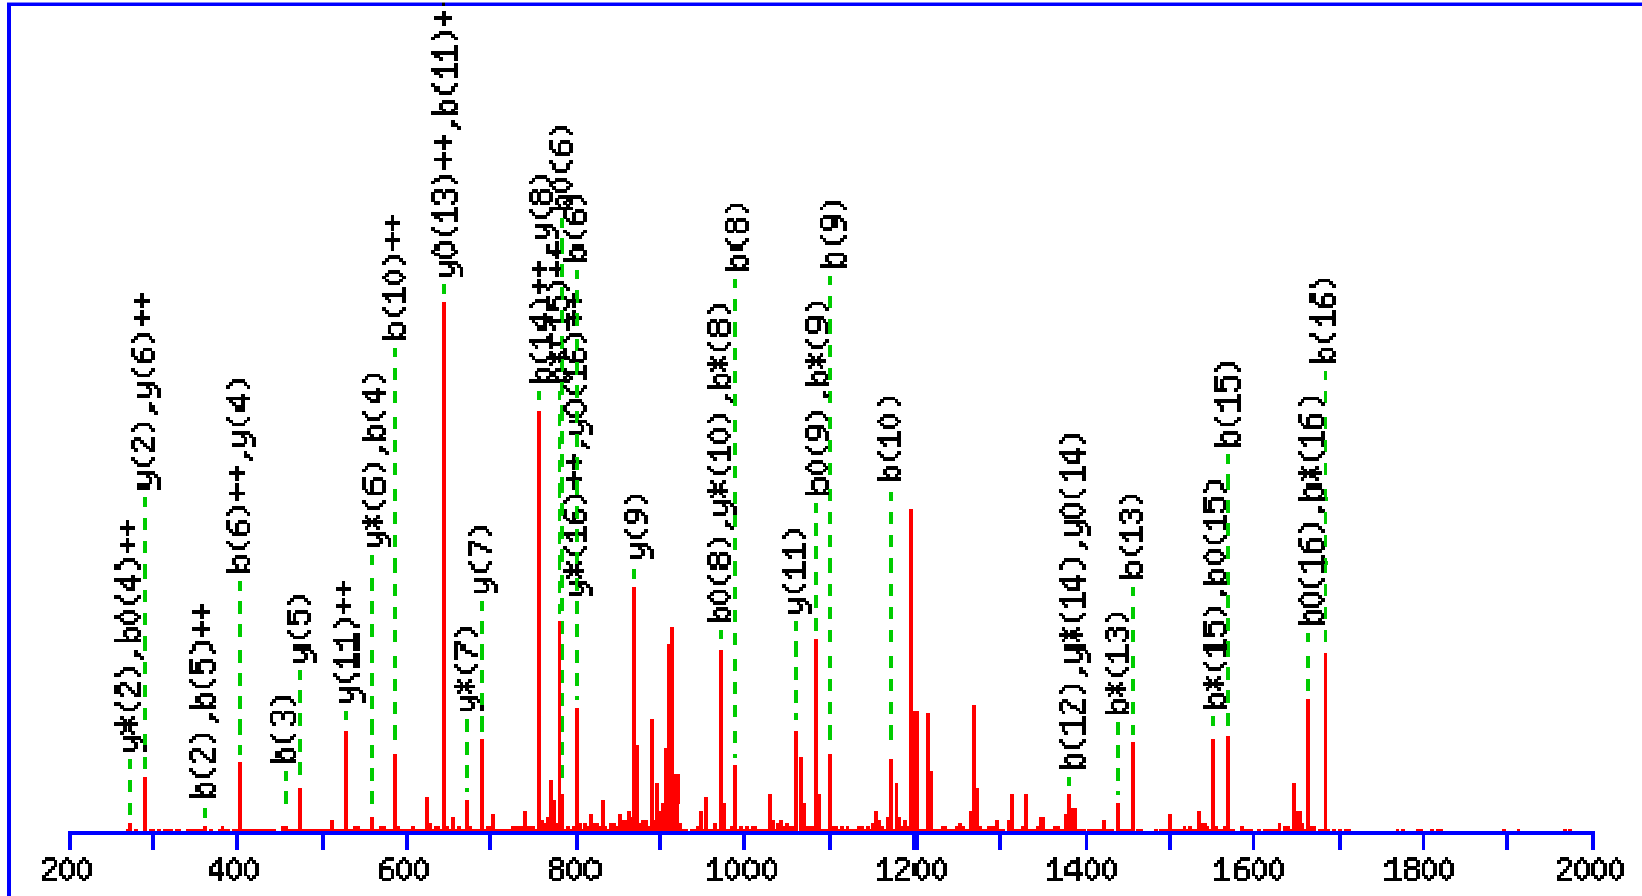

MRPL2

Sequence

KVNGTIAIQLPSA

Phosphosite

Thr224, Ser231

Score m/z

59 738.05

Mr(expt)

1474.08

Mr(calc)

1471.49

Delta

2.59

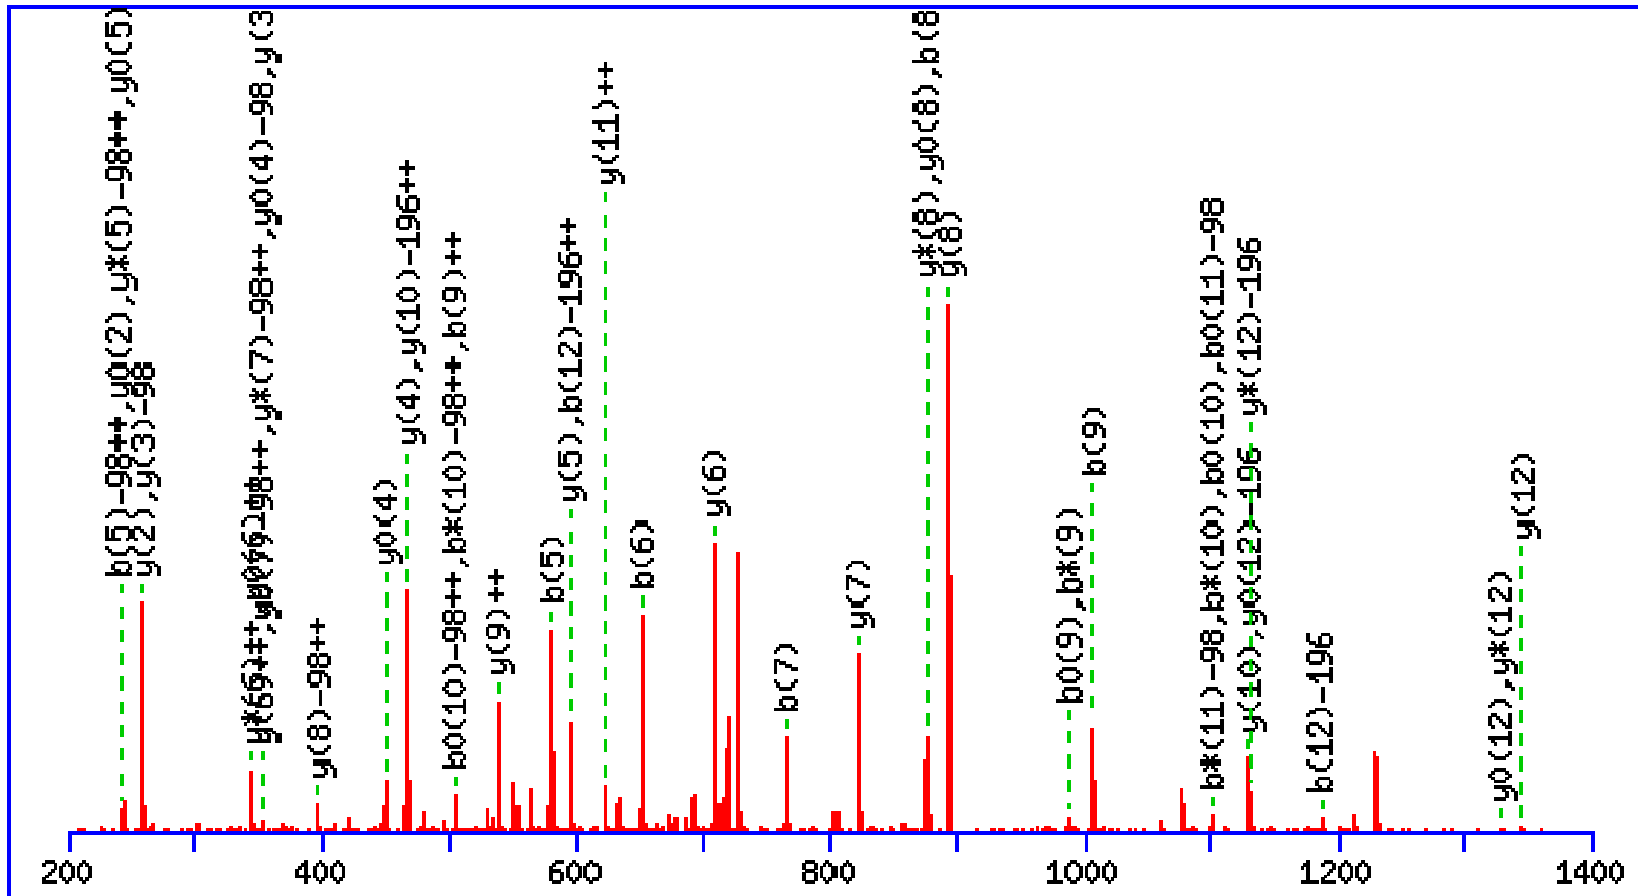

MRPL2

Sequence

QM~~Q~~VLETCTATVGR

Phosphosite

Thr242 or Thr244

Score

43 809.80

Mr(expt)

1617.59

Mr(calc)

1616.75

Delta

0.84

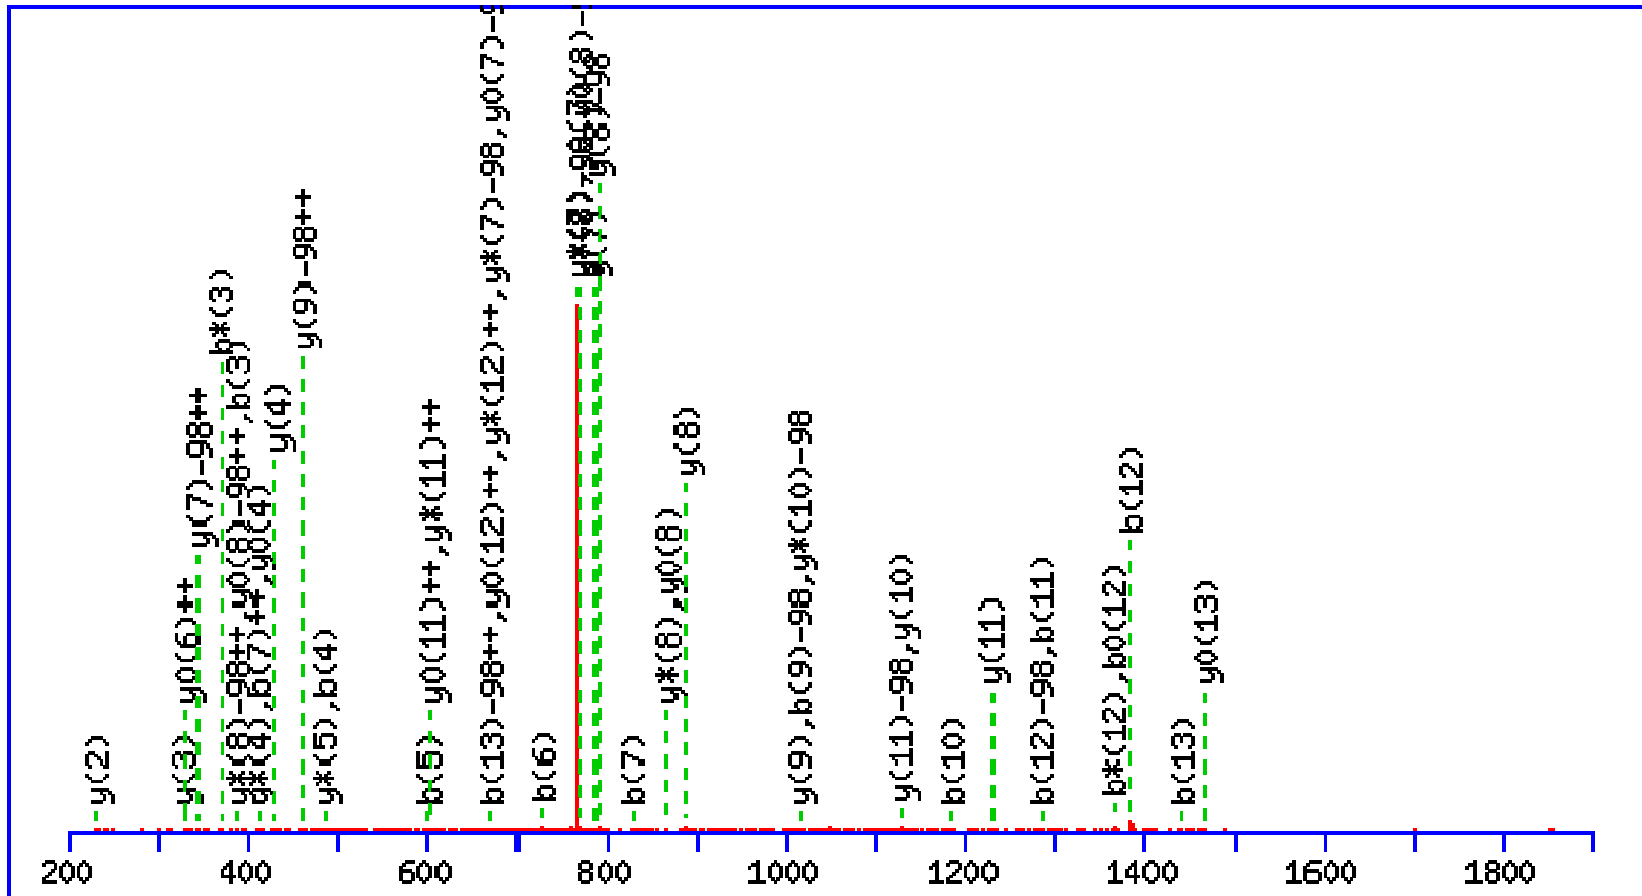

MRPL3

Sequence

VLDRCTGGLGTALGSGNR

Phosphosite

Thr19, Ser28

Score m/z

41 637.07

Mr(expt)

1908.18

Mr(calc)

1906.90

Delta

1.28

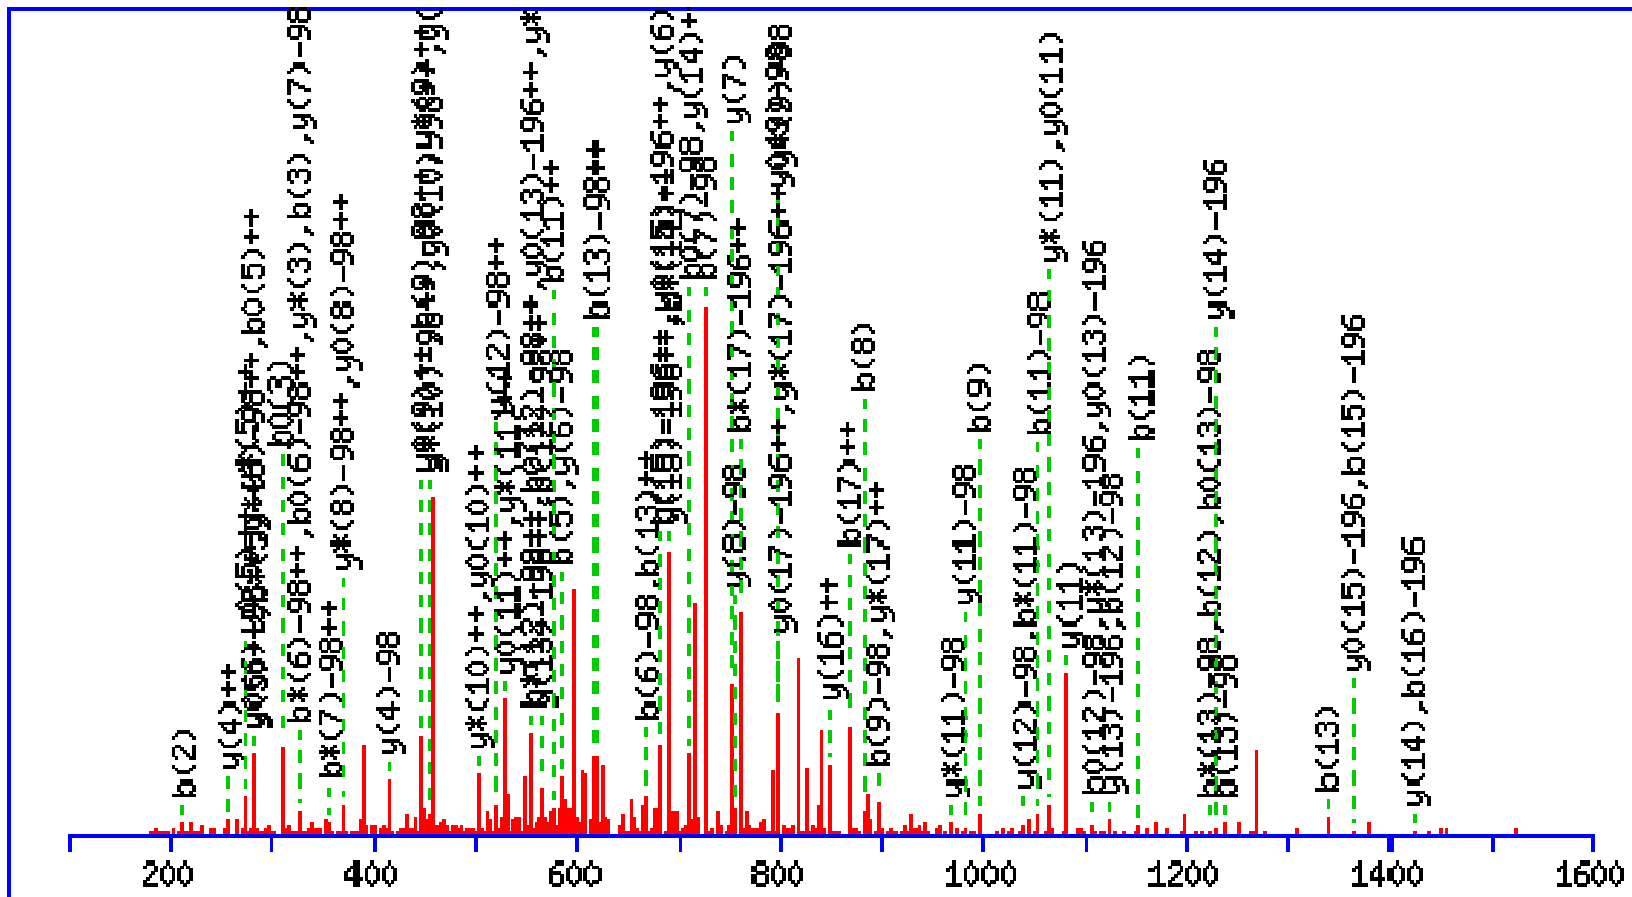

MRPL3

Sequence

TTGGLGTALGSGNR

Phosphosite

Ser28

Score m/z

46 671.32

Mr(expt)

1340.63

Mr(calc)

1341.32

Delta

-0.69

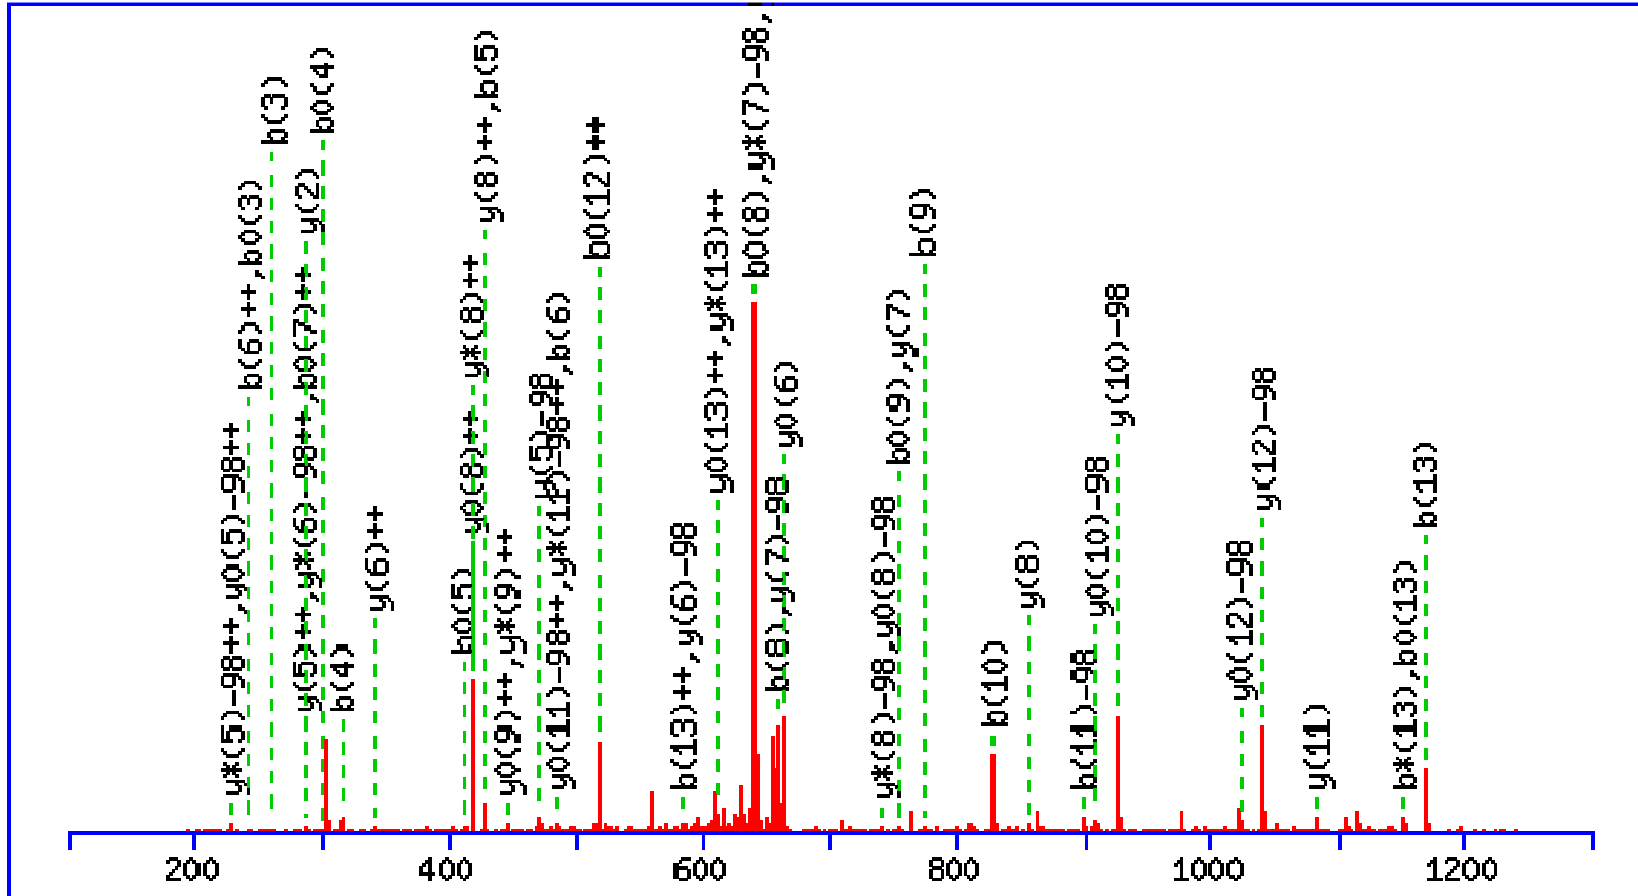

MRPL9

Sequence  
LSGSTPGSER

Phosphosite  
Ser37, Ser40

Score m/z  
41 576.10

Mr(expt)  
1150.18

Mr(calc)  
1149.99

Delta  
0.20

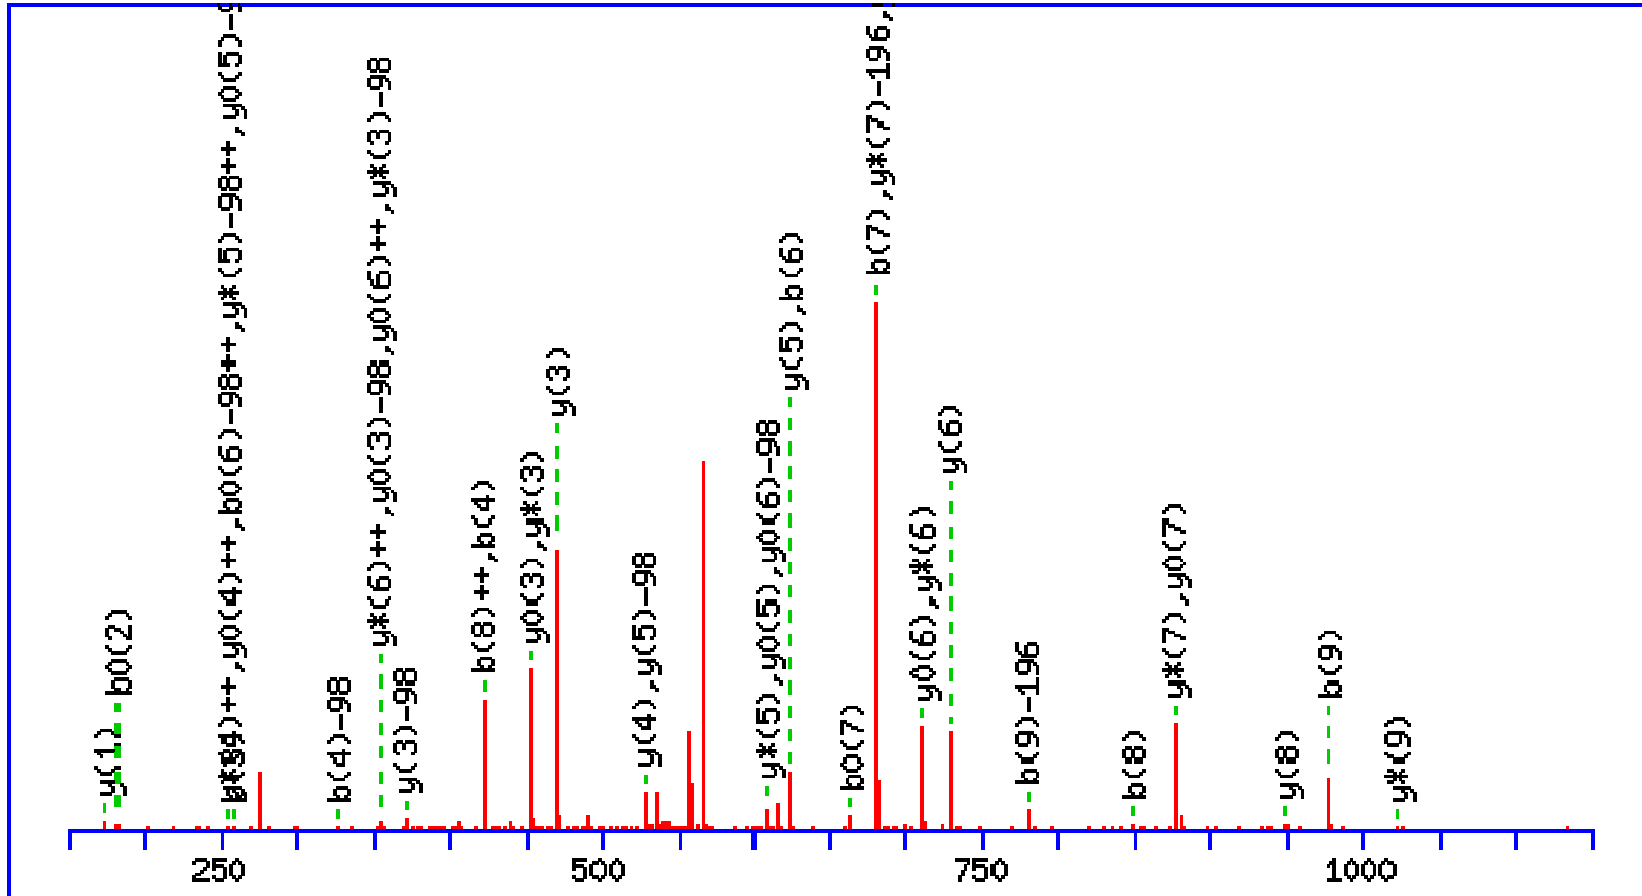

MRPL9

Sequence

GEYWCEVTVNGLDTR

Phosphosite

Tyr219

Score m/z

33 962.31

Mr(expt)

1922.61

Mr(calc)

1920.99

Delta

1.63

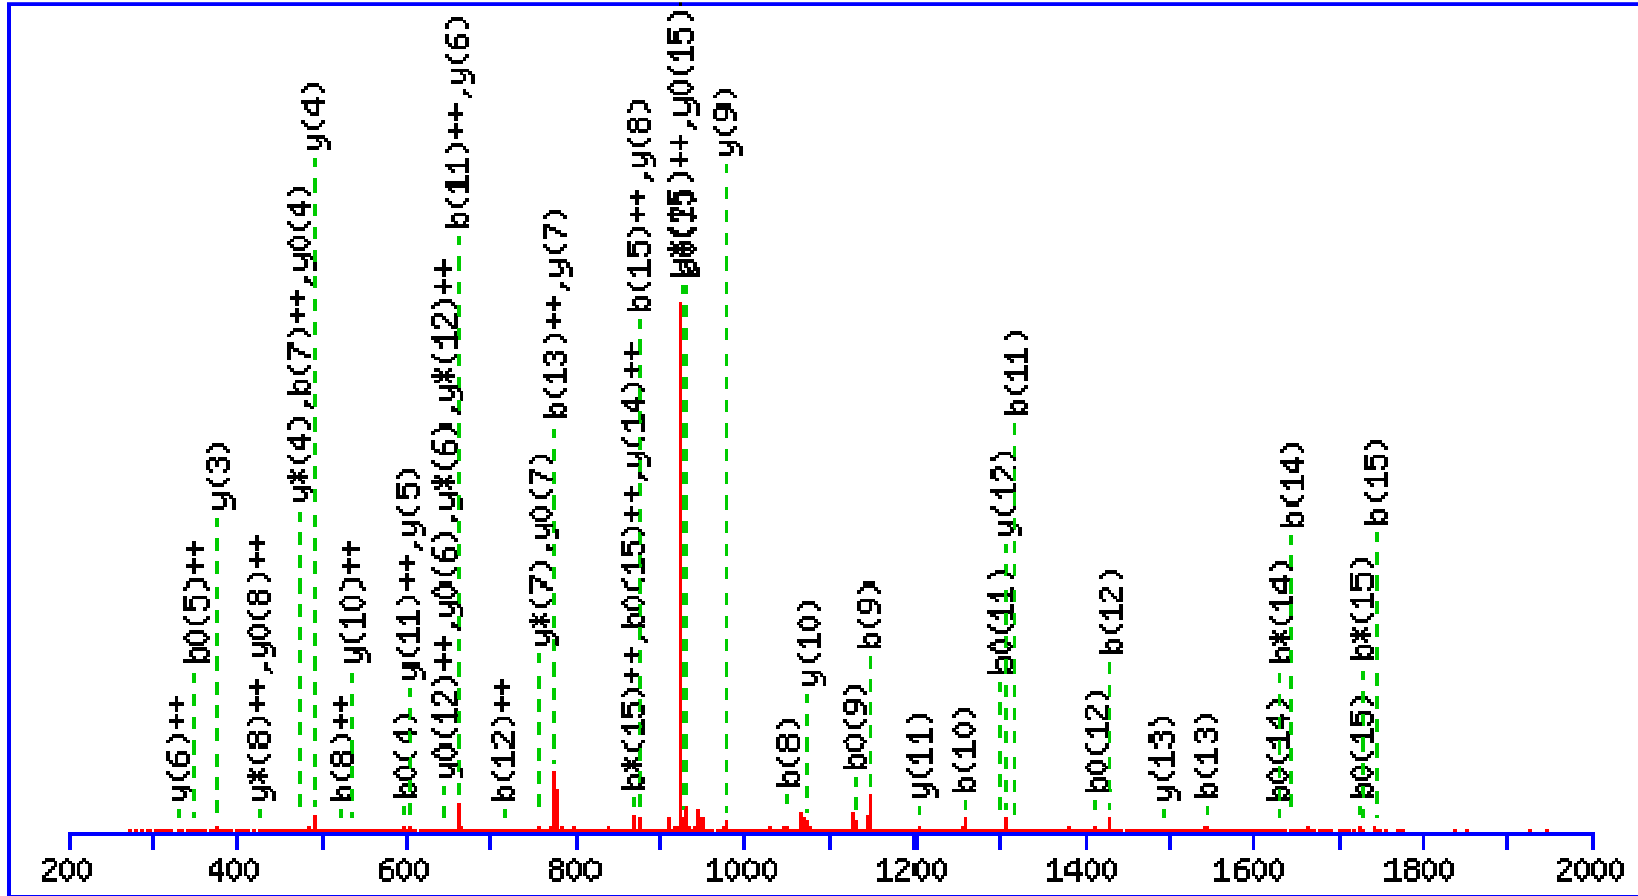



MRPL10

Sequence

EMVRILKSVPFLPLLGGCIDD-  
TILSR

Phosphosite

Met164, Lys169, Ser170,  
Thr184, Ser187

Score m/z

41 1062.37

Mr(expt)

3185.00

Mr(calc)

3184.45

Delta

-0.35

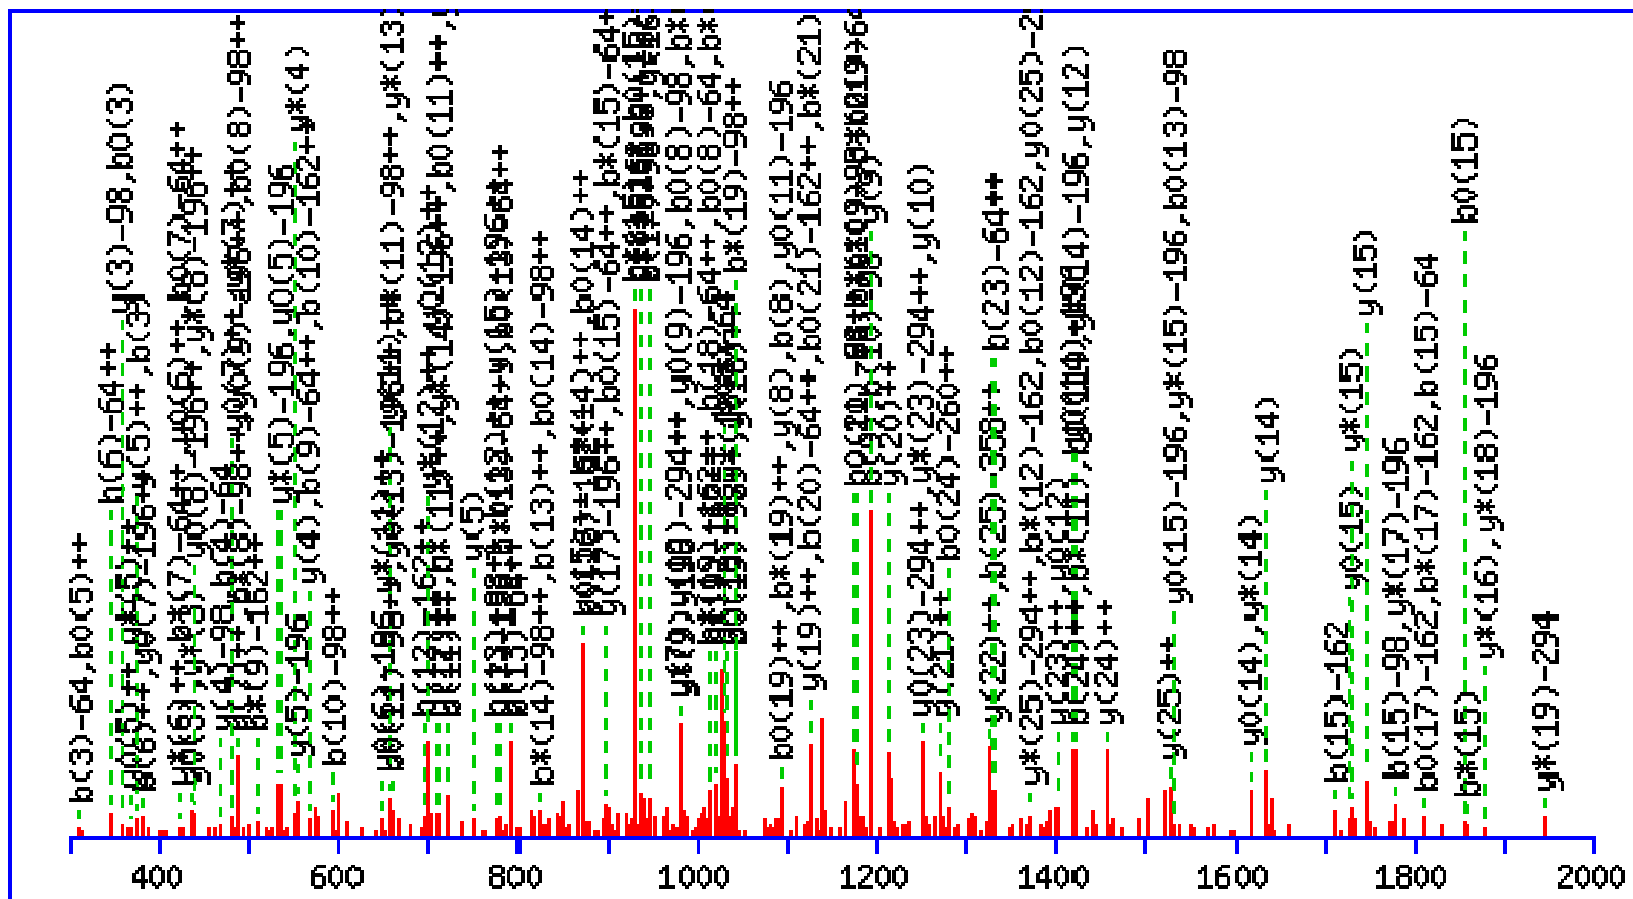

MRPL10

Sequence

ILKSVPLPLLGGCIDDTILSR

Phosphosite

Lys169, Ser170

Score m/z

47 857.99

Mr(expt)

2570.97

Mr(calc)

2572.84

Delta

-1.87

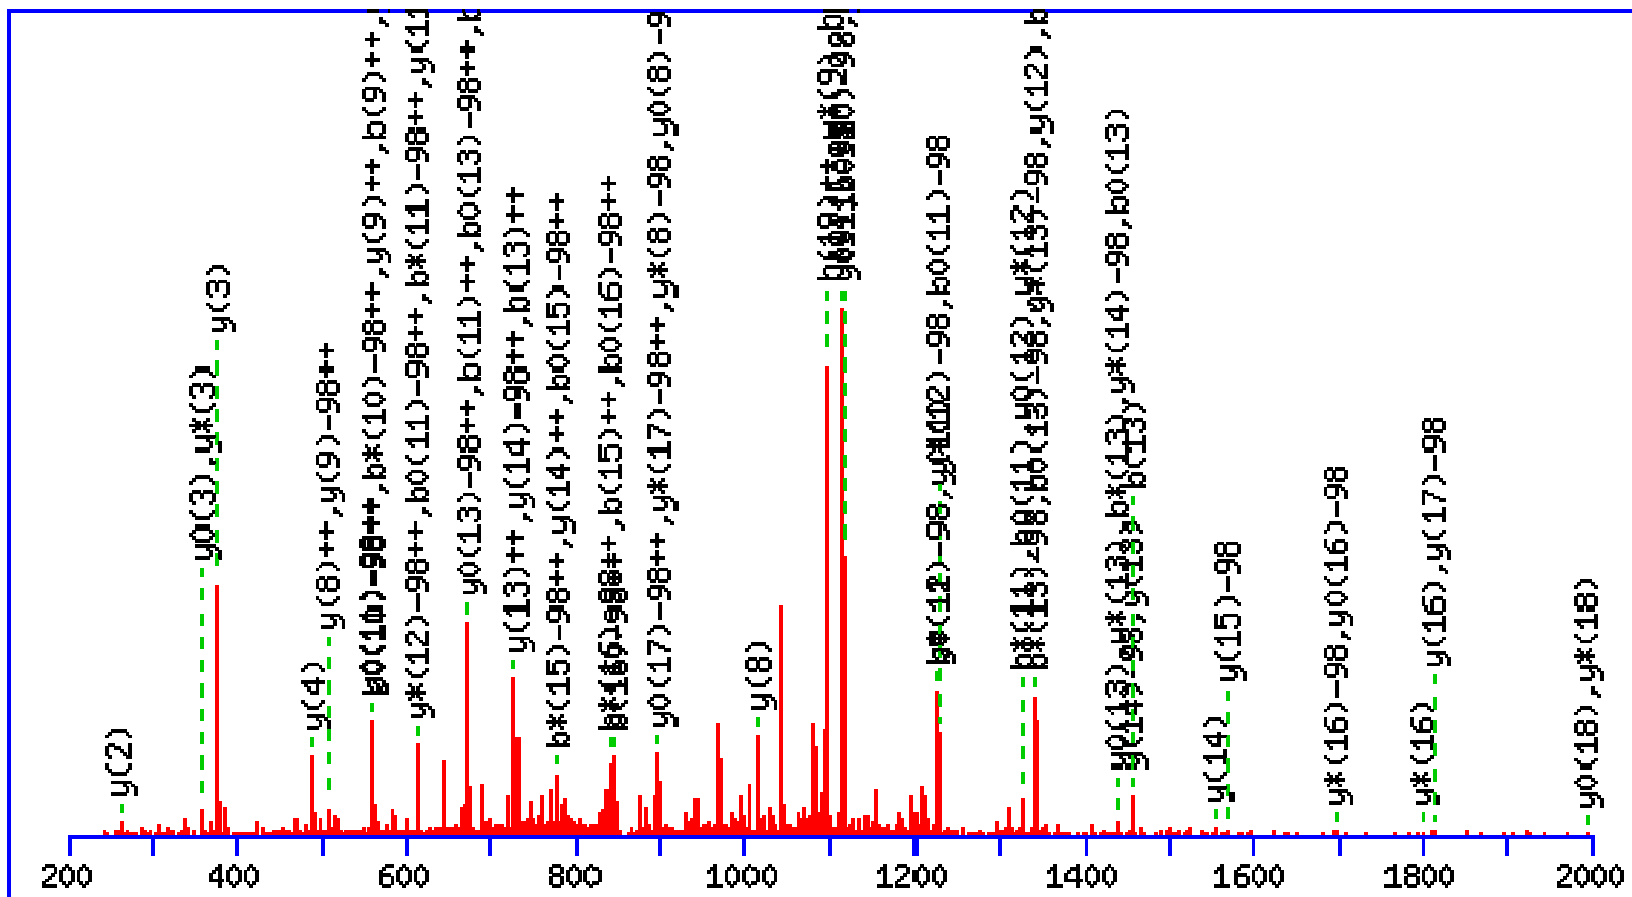

MRPL10

Sequence

QGFINYSKLPSLALAQGELVG-  
GLTLLTAR

Phosphosite

Tyr194, Lys196,  
Ser199, Thr212

Score m/z  
54 1104.63

Mr(expt)  
3310.87

Mr(calc)  
3313.48

Delta  
-2.60

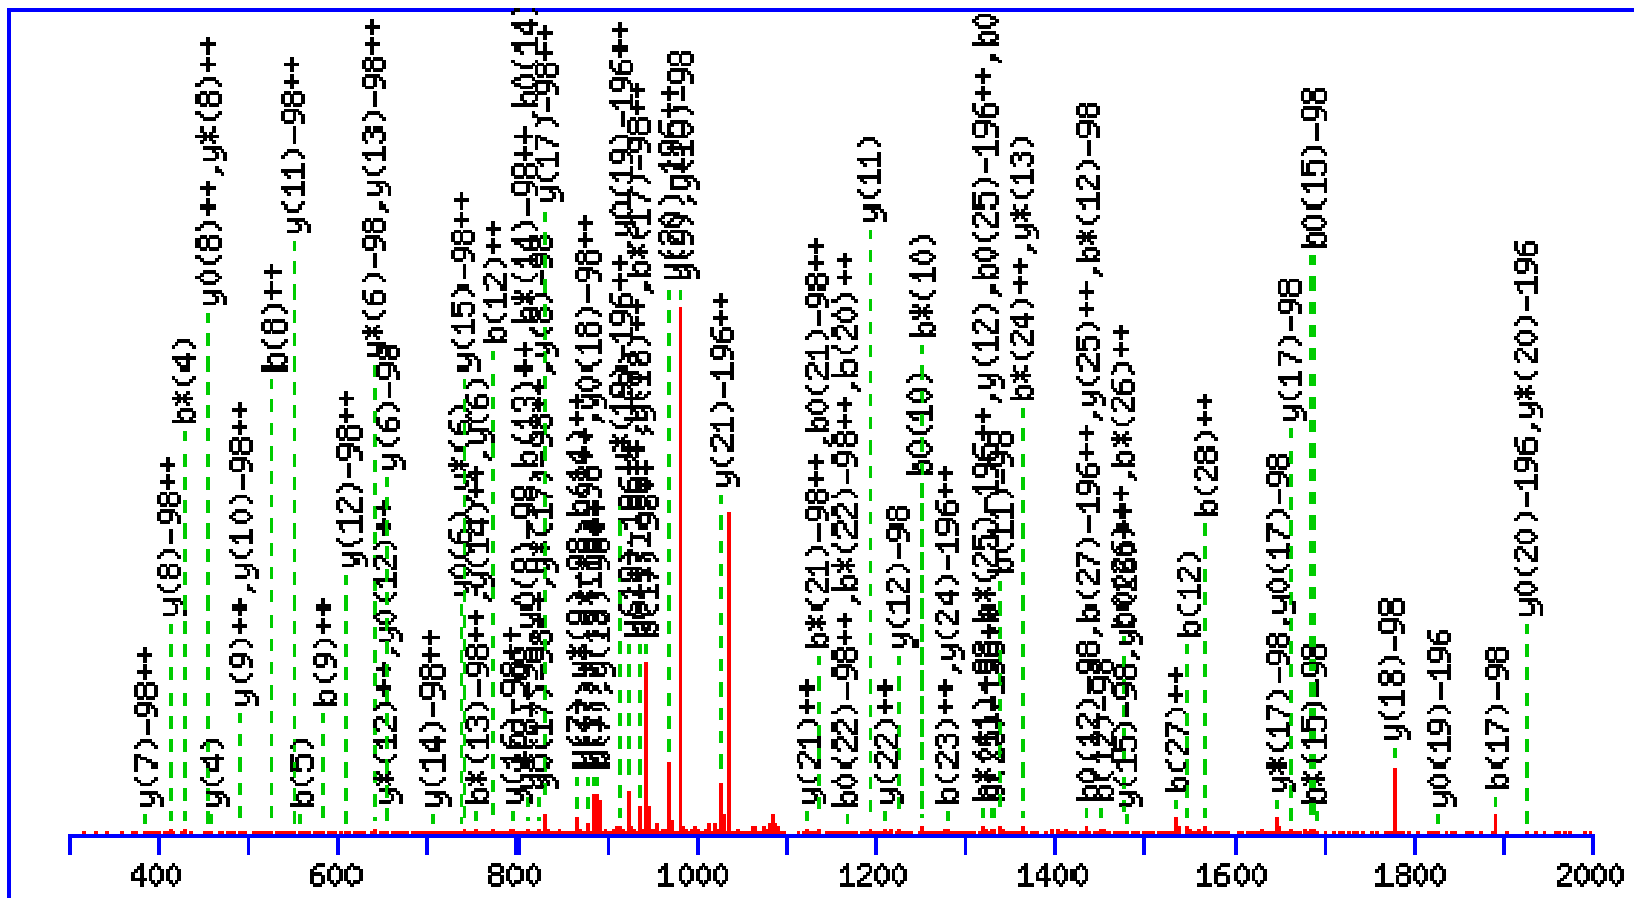

MRPL13

Sequence

QVTAAQLHR

Phosphosite

Thr91

Score

23 552.44

Mr(expt)

1102.87

Mr(calc)

1103.13

Delta

-0.25

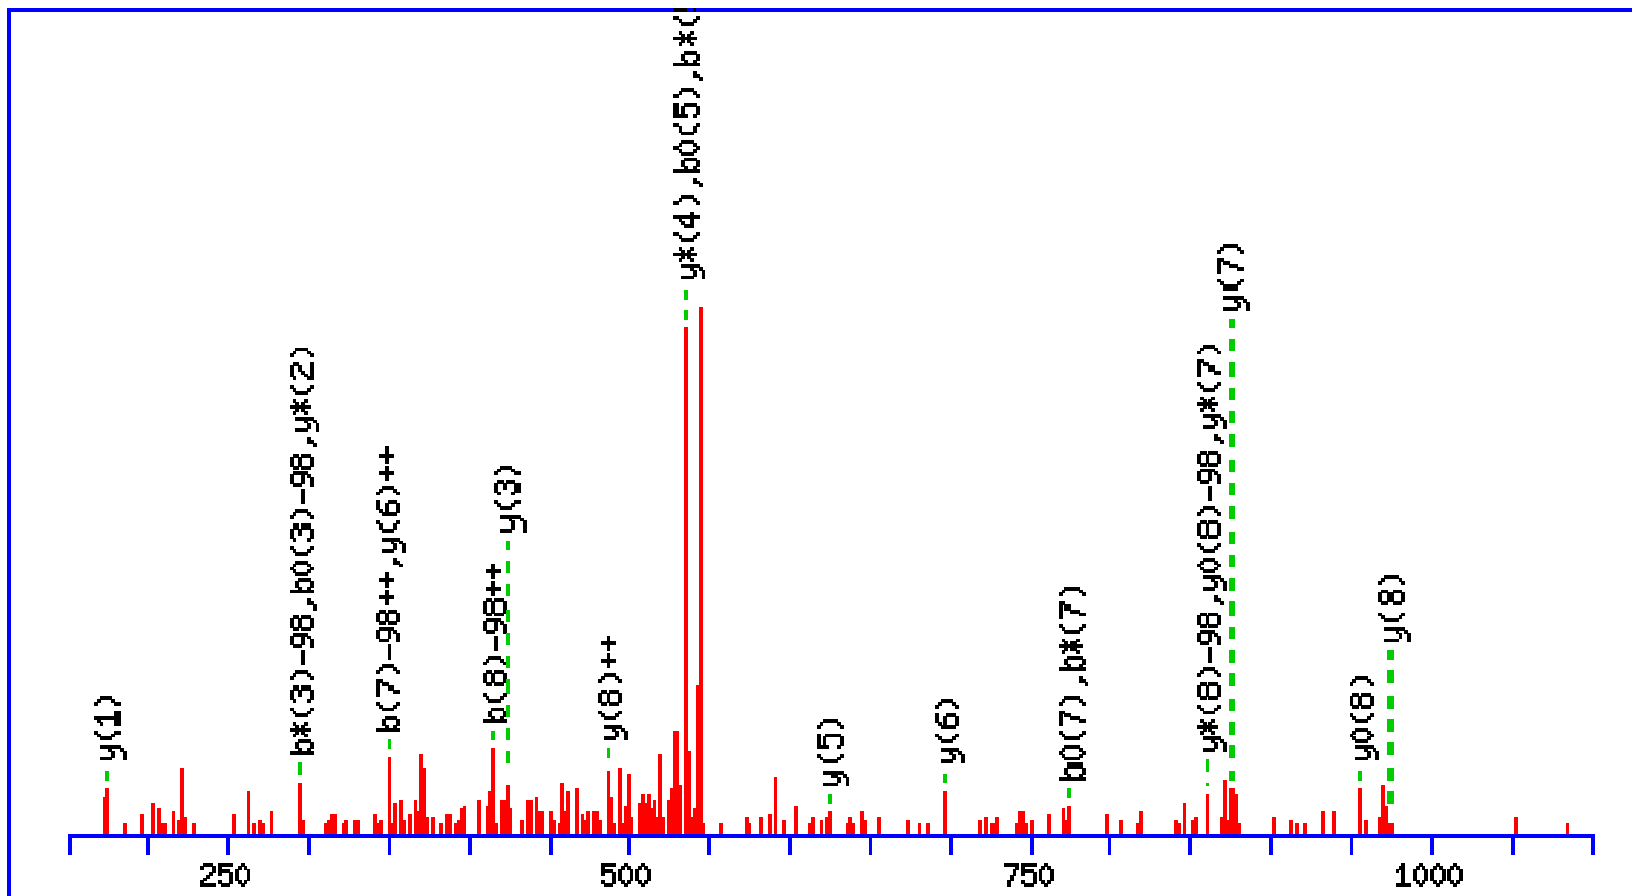

MRPL13

Sequence

VWSPEDYRL

Phosphosite

Ser172

Score

m/z

Mr(expt)

Mr(calc)

Delta

35

672.41

1342.78

1341.36

1.43

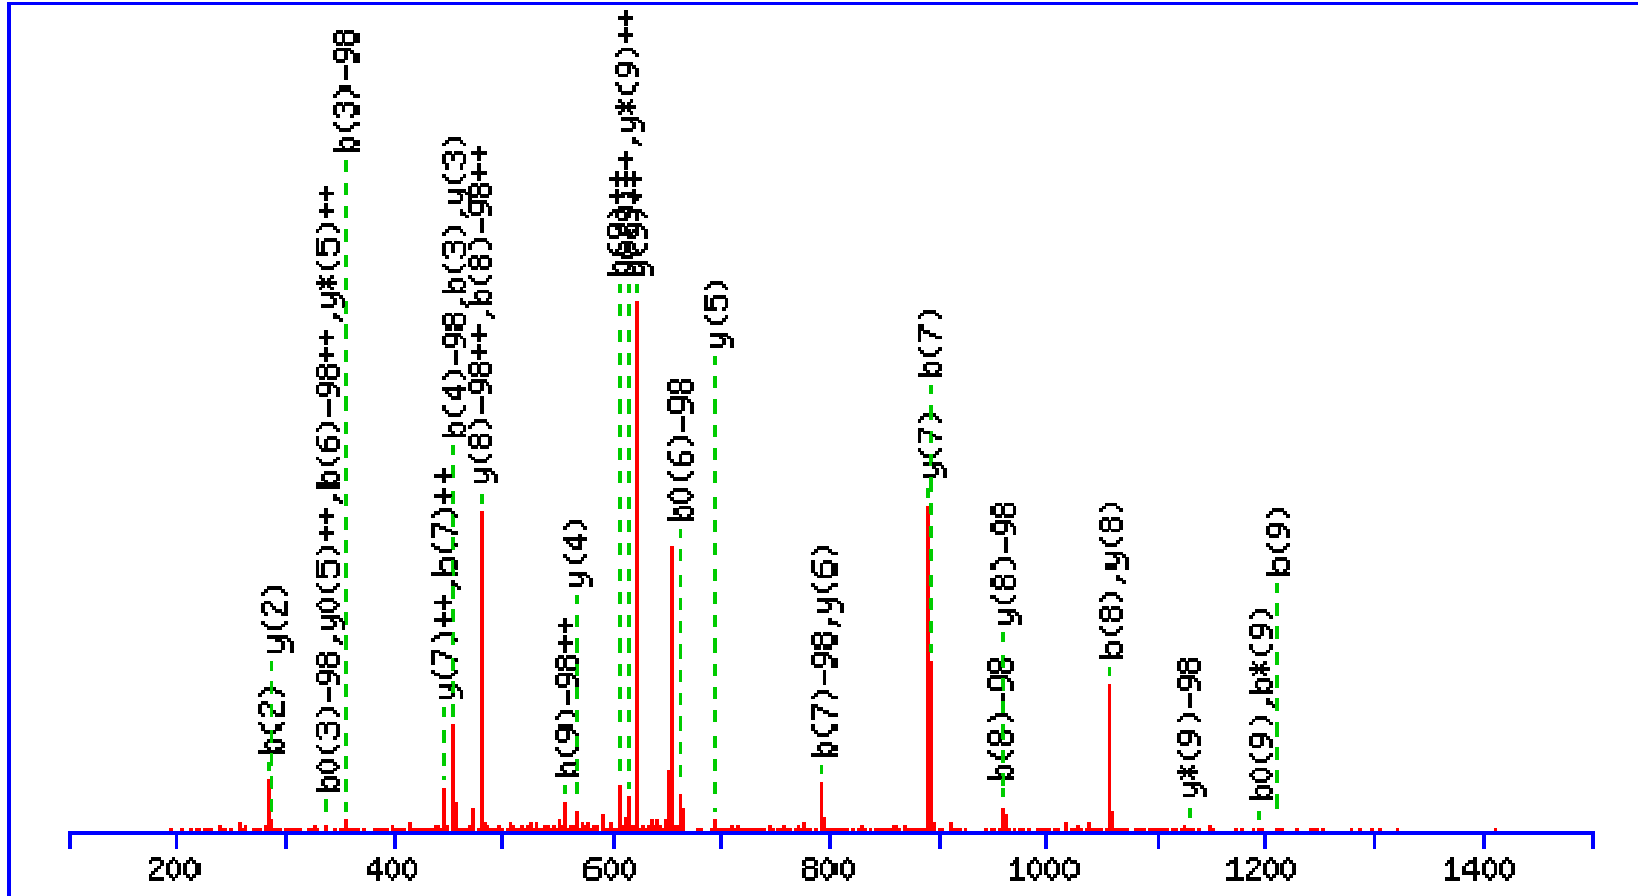

MRPL15

Sequence

DYGVQLVEEGADTFK

Phosphosite

Tyr137

Score m/z  
42 875.80

Mr(expt)  
1749.59

Mr(calc)  
1750.75

Delta  
-1.16

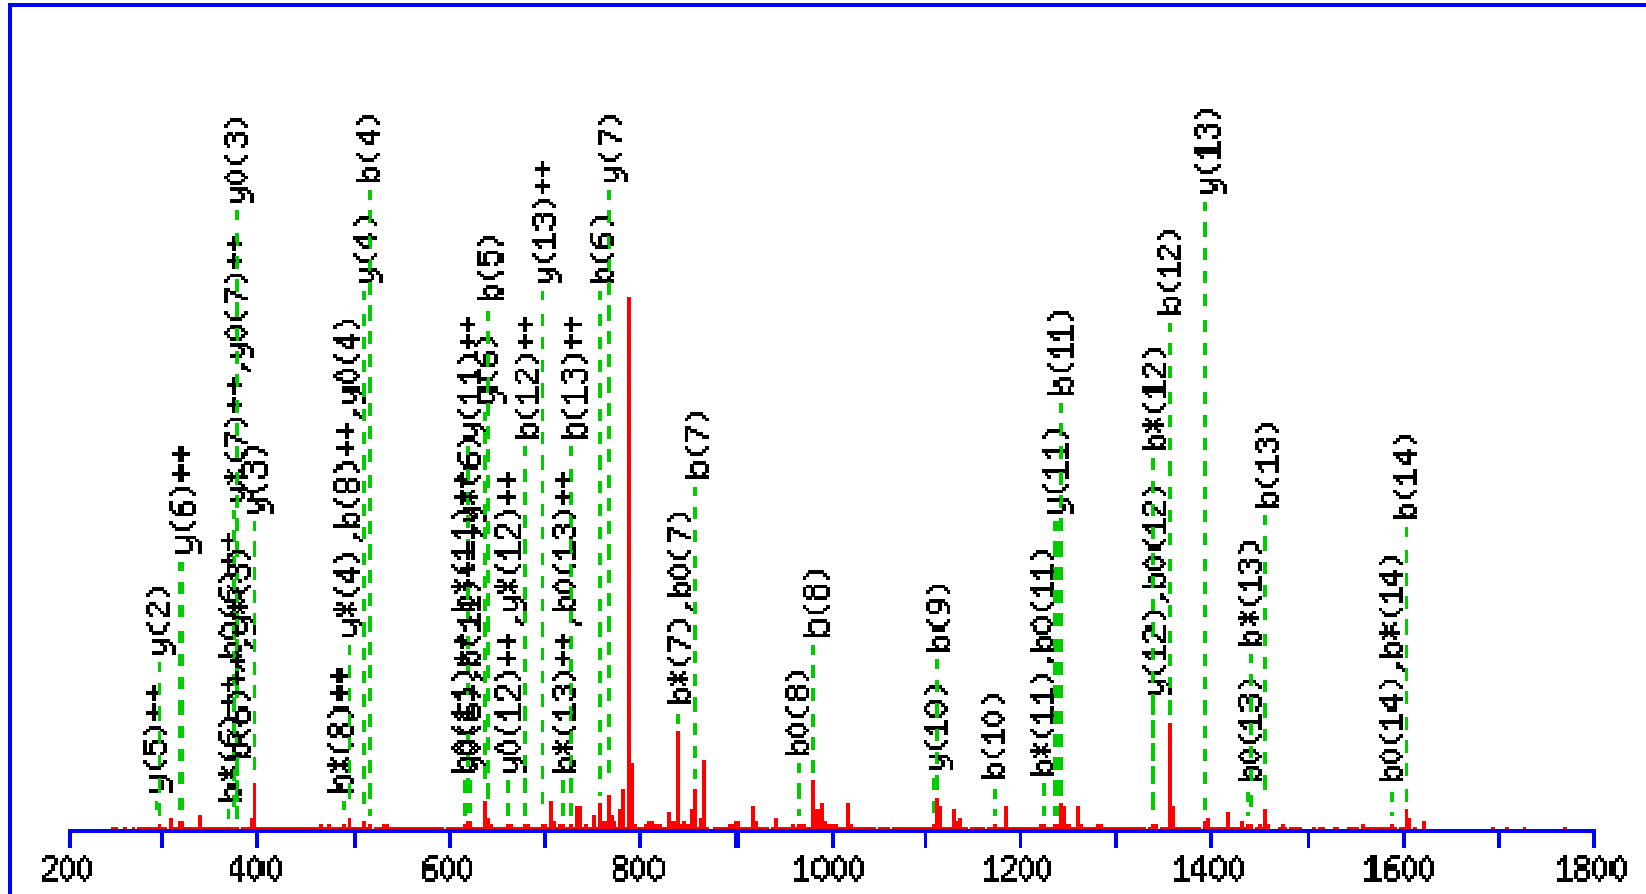

MRPL18

Sequence

HLYSTKSVVACESVGR

Phosphosite

Ser118, Ser121, Ser127

Score

m/z 34 988.66

Mr(expt)

1975.31

Mr(calc)

1976.90

Delta

-0.59

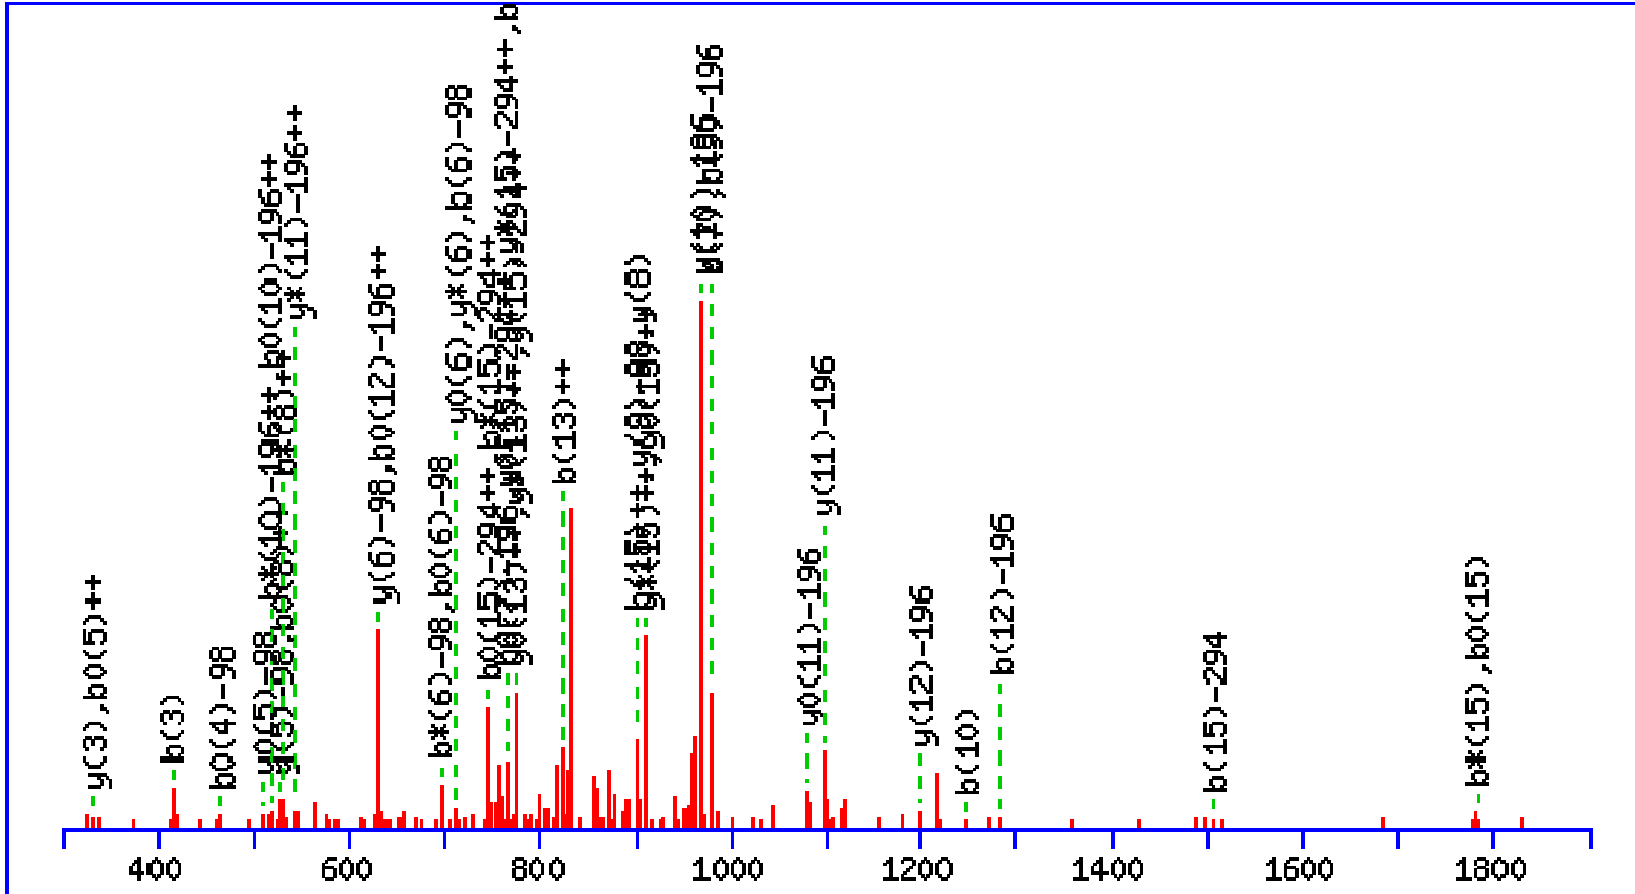

MRPL24

Sequence

YGMSRPGSLADKKK

Phosphosite

Tyr21, Met23

Score m/z

38 818.47

Mr(expt)

1634.93

Mr(calc)

1633.76

Delta

1.17

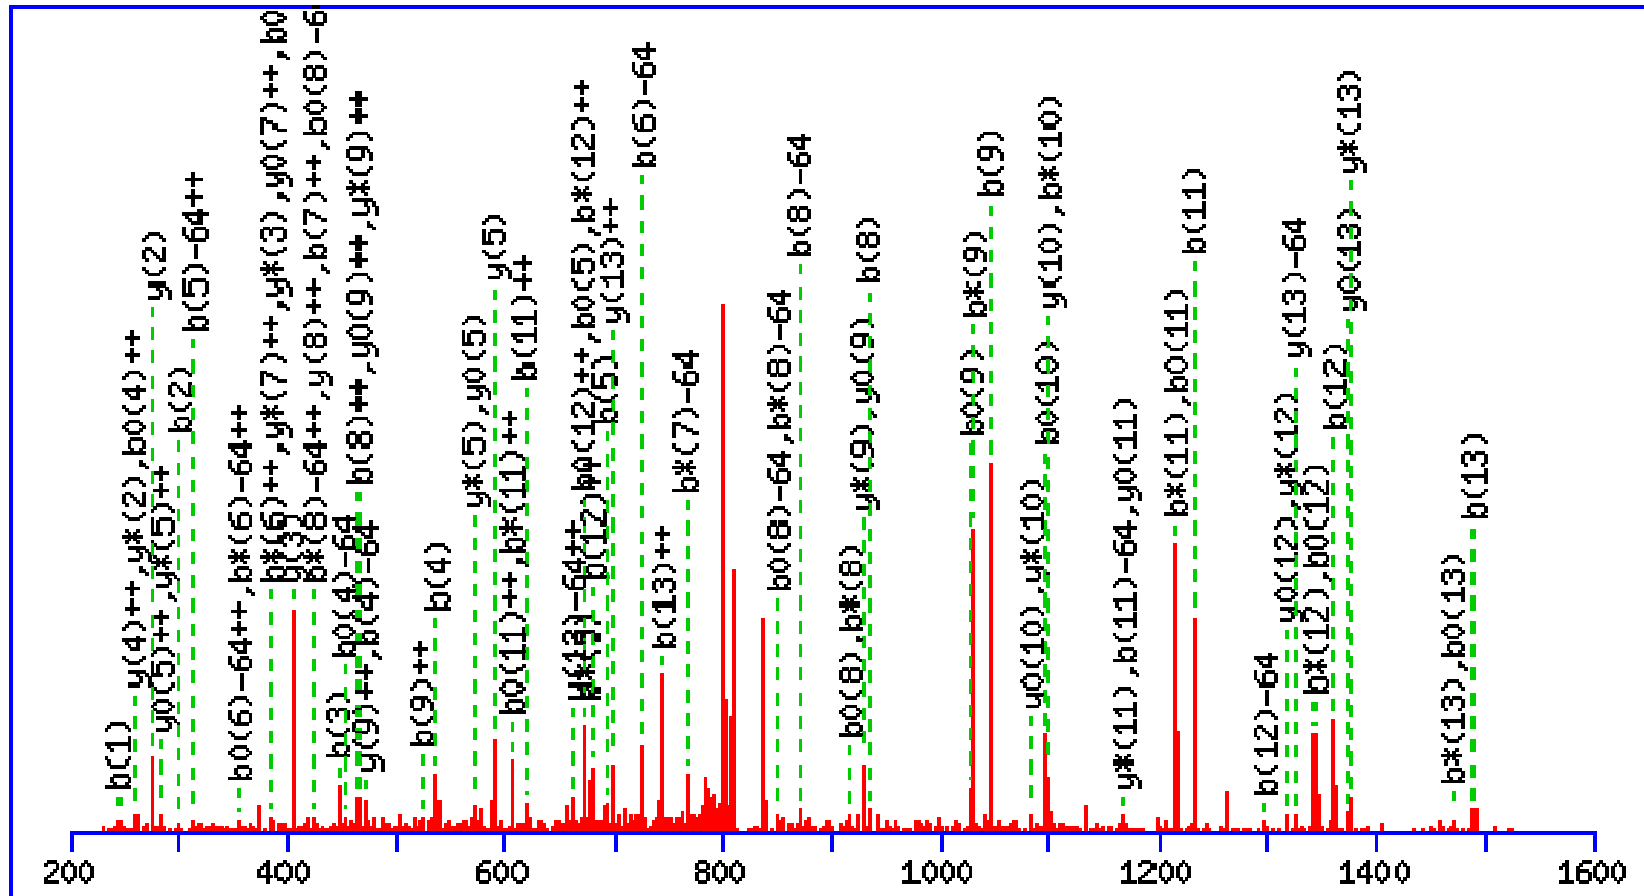



MRPL27

Sequence

TRTAVTALLSPQAAALAVR

Phosphosite

Ser19

Score m/z

40 1045.41

Mr(expt)

2088.81

Mr(calc)

2087.32

Delta

1.49

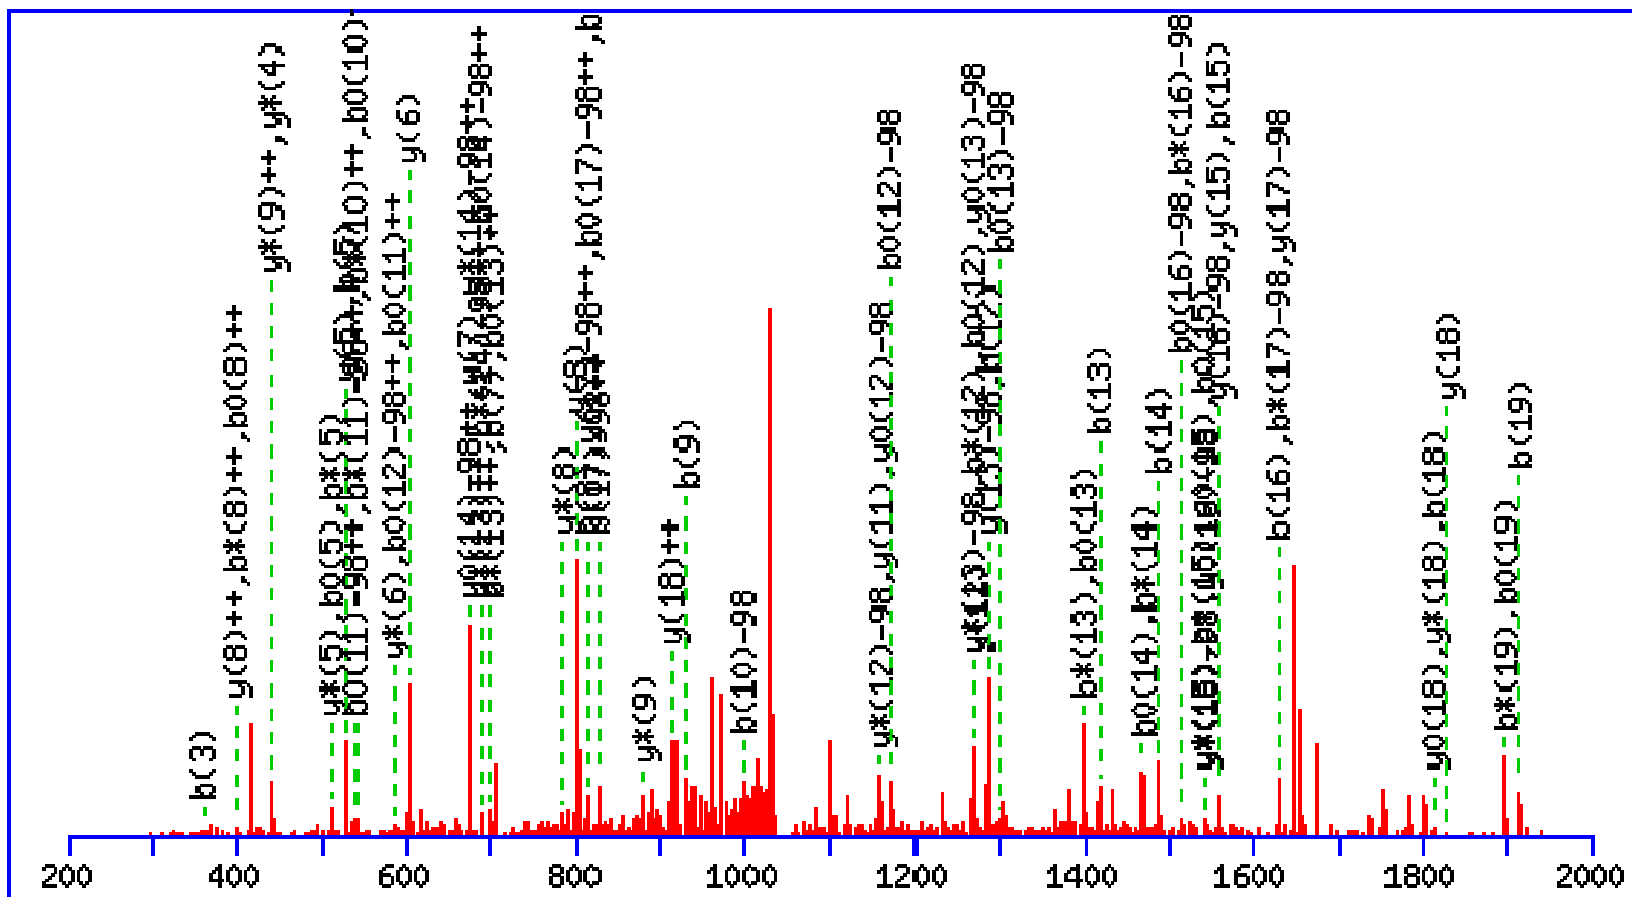

MRPL28

Sequence

VYVEELVEQLAQQALSEPAVVQK

Phosphosite

Tyr230

Score

82 m/z

Mr(expt)

2653.29

Mr(calc)

2650.87

Delta

2.42

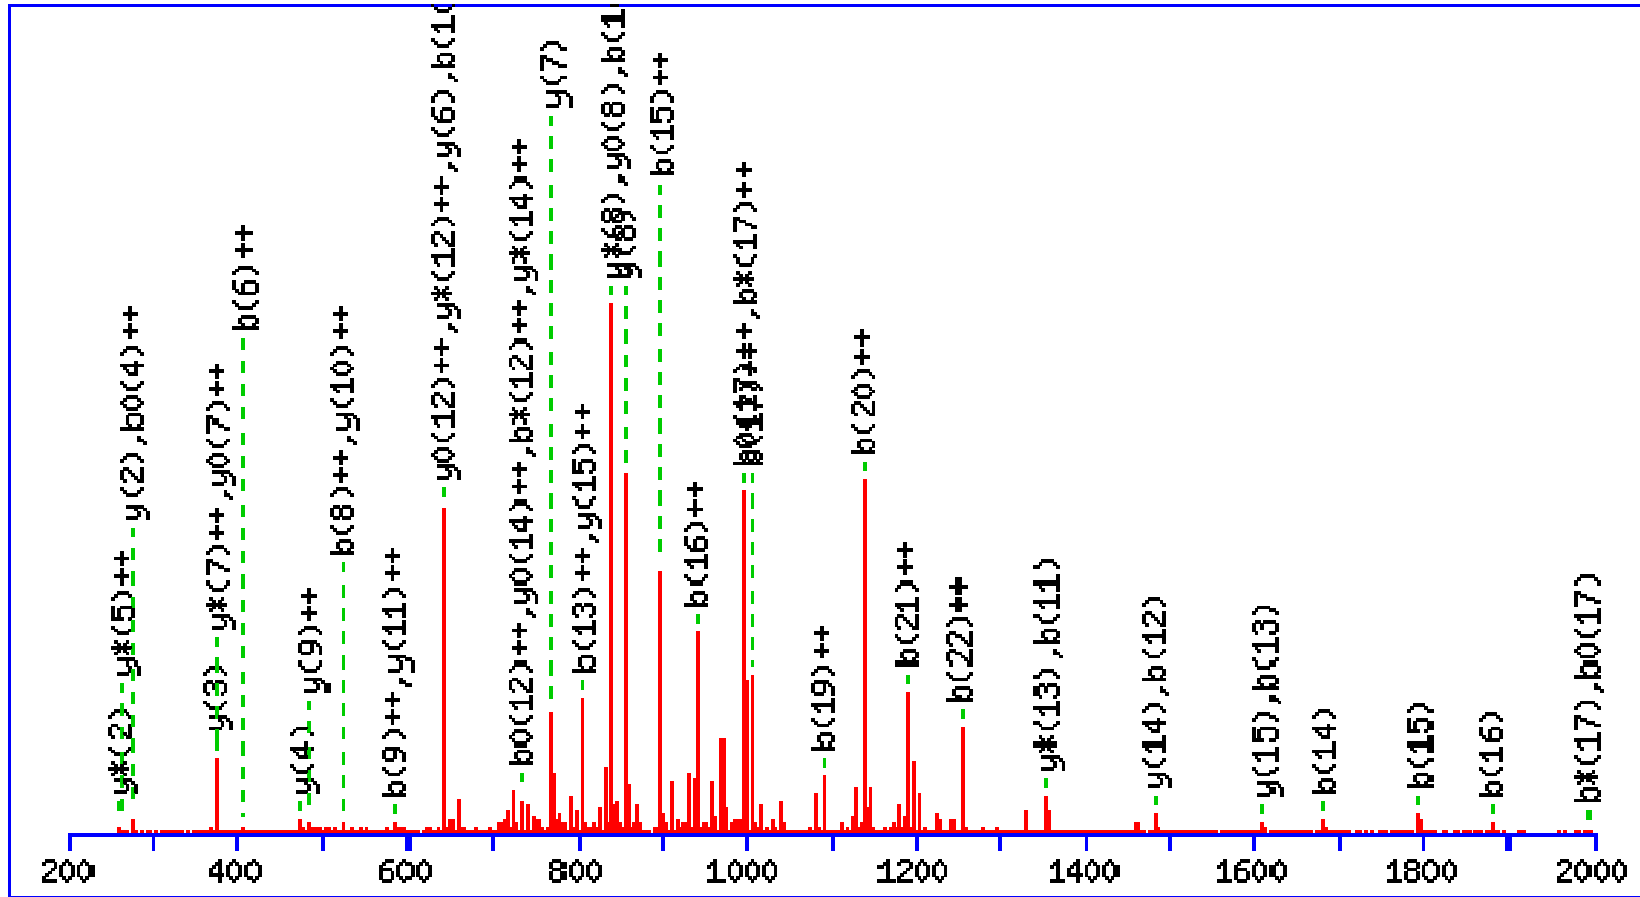

**MRPL40**

Sequence

NMLSTTWKR

Phosphosite

Met208, Ser210, Thr211

Score m/z

26 656.92

Mr(expt)

1311.82

Mr(calc)

1312.28

Delta

-0.46

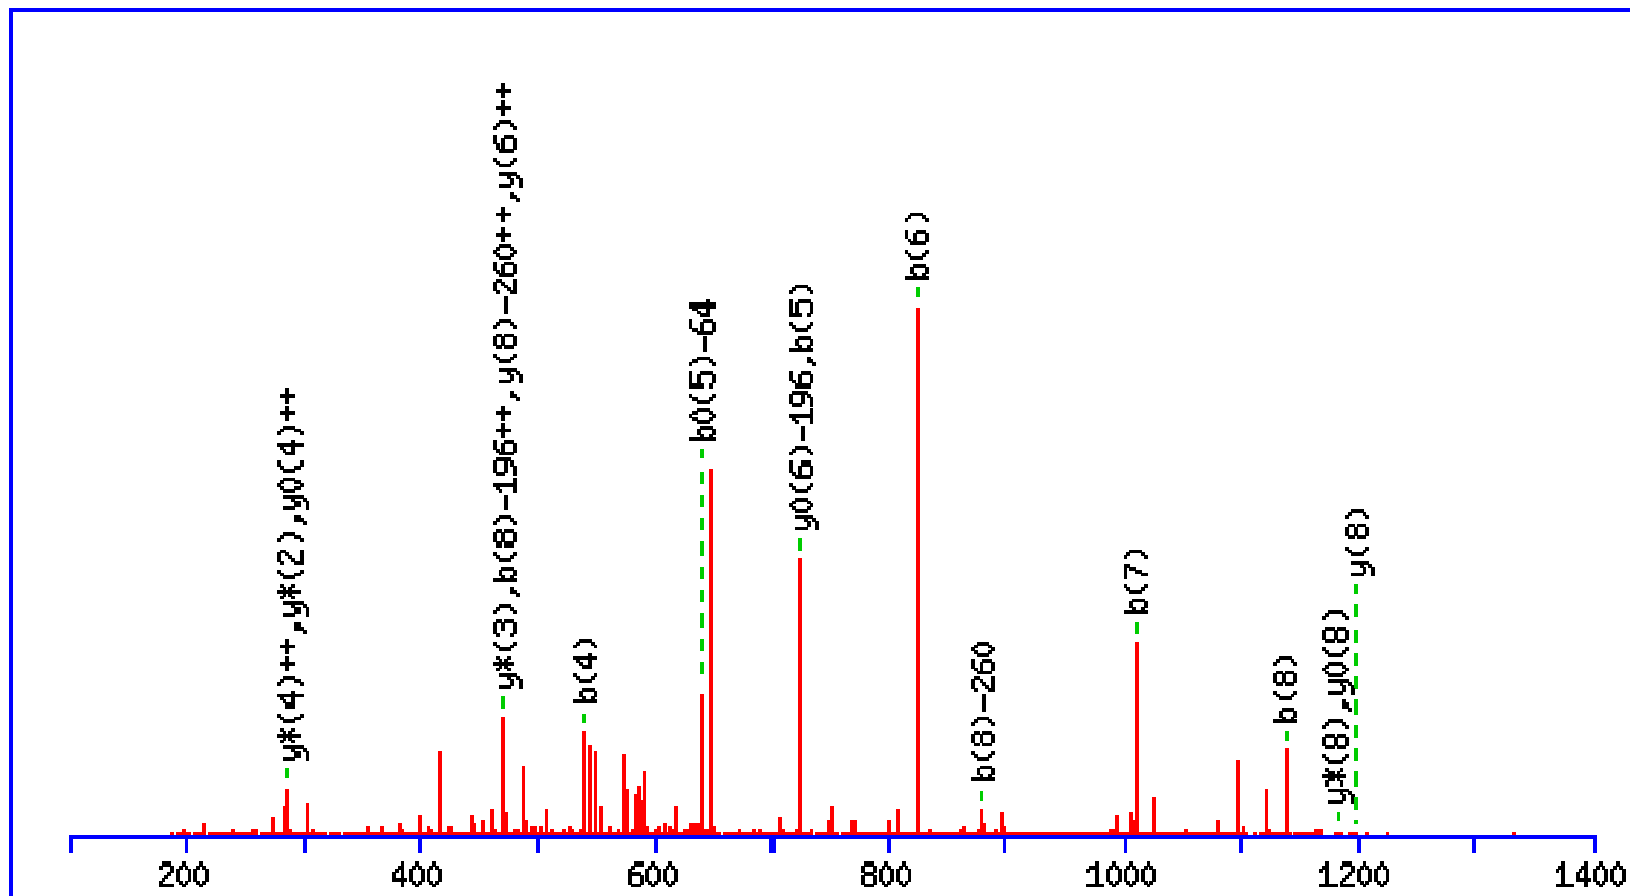

MRPL40

Sequence

ESTLIQVHGSSGAQLNAK

Phosphosite

Ser217, Thr218

Score m/z

56 668.12

Mr(expt)

2001.35

Mr(calc)

1999.96

Delta

1.39

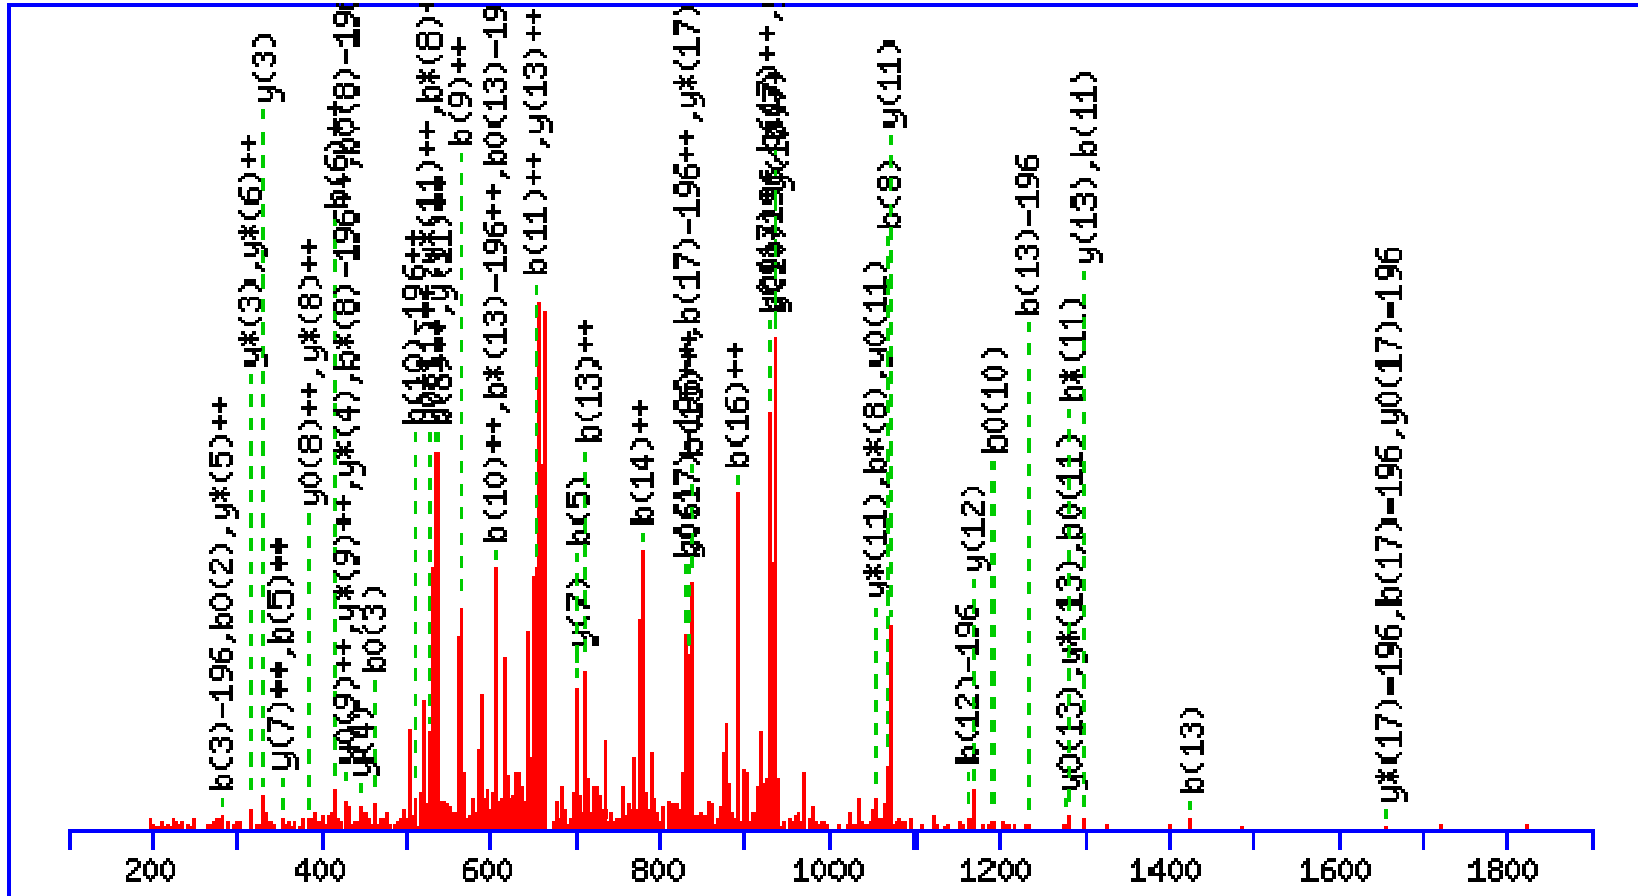

MRPL43

Sequence

Phosphosite

Score m/z

Mr(expt)

Mr(calc)

Delta

FLTSVLHNGLGR

Thr12

42

698.30

1394.58

1393.48

1.09

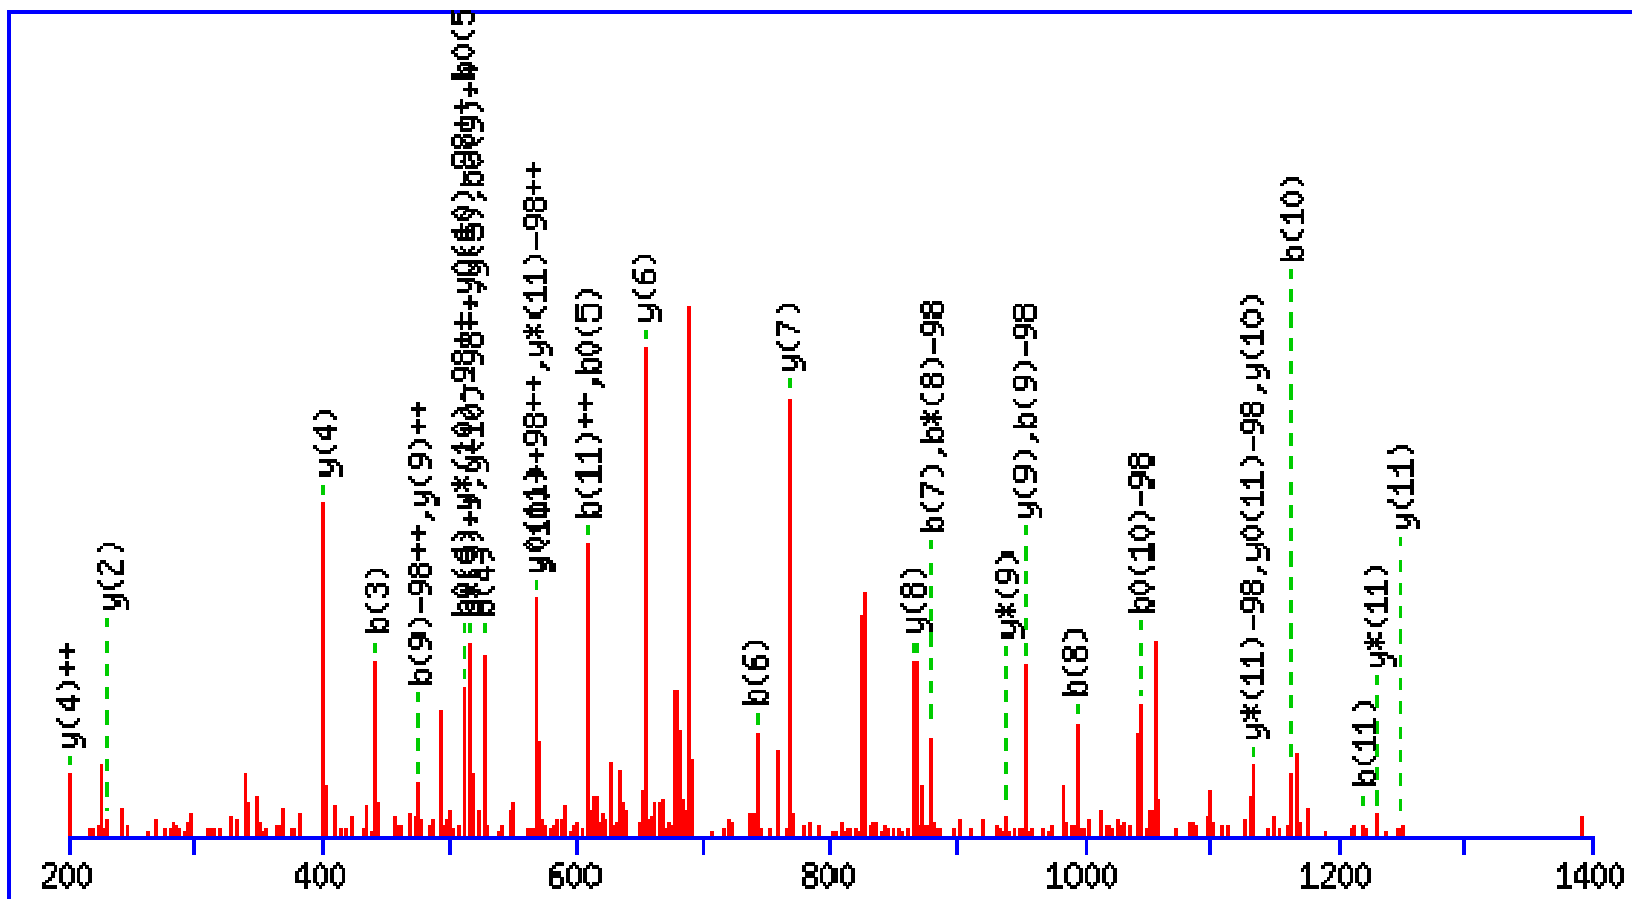

MRPL45

Sequence

CSSLVTKSNAYGQVTVR

Phosphosite

Ser200, Ser206

Score m/z

27 658.62

Mr(expt)

1972.83

Mr(calc)

1973.00

Delta

-0.17

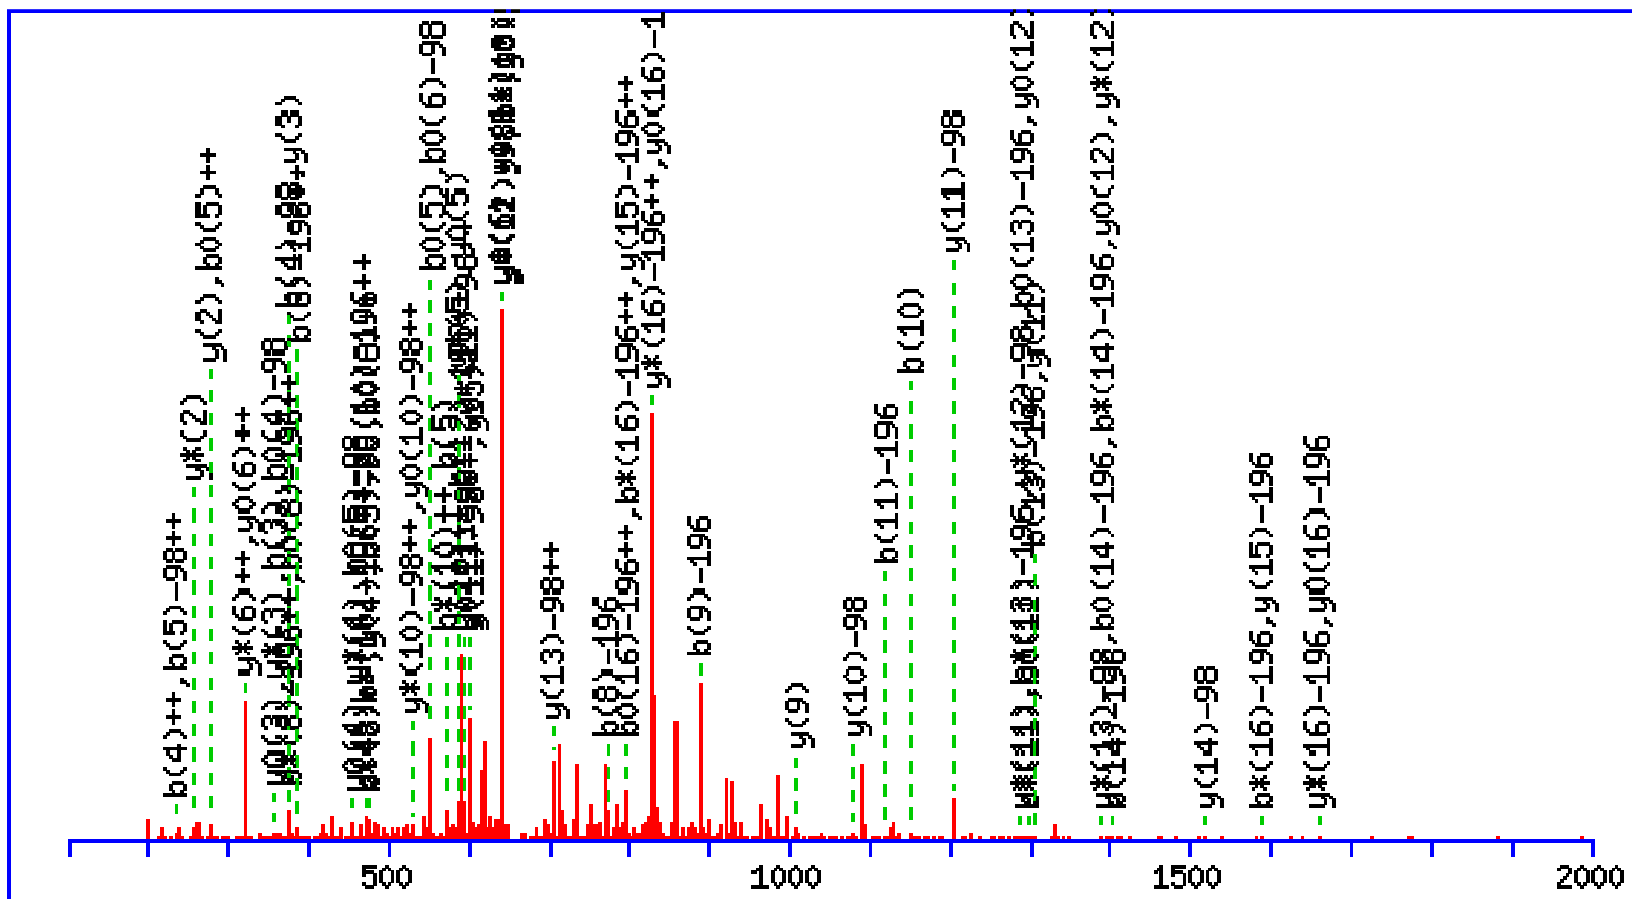

MRPL49

Sequence

RLTQGTPDYPR

Phosphosite

Thr32

Score m/z

34 692.76

Mr(expt)

1383.50

Mr(calc)

1383.40

Delta

0.10

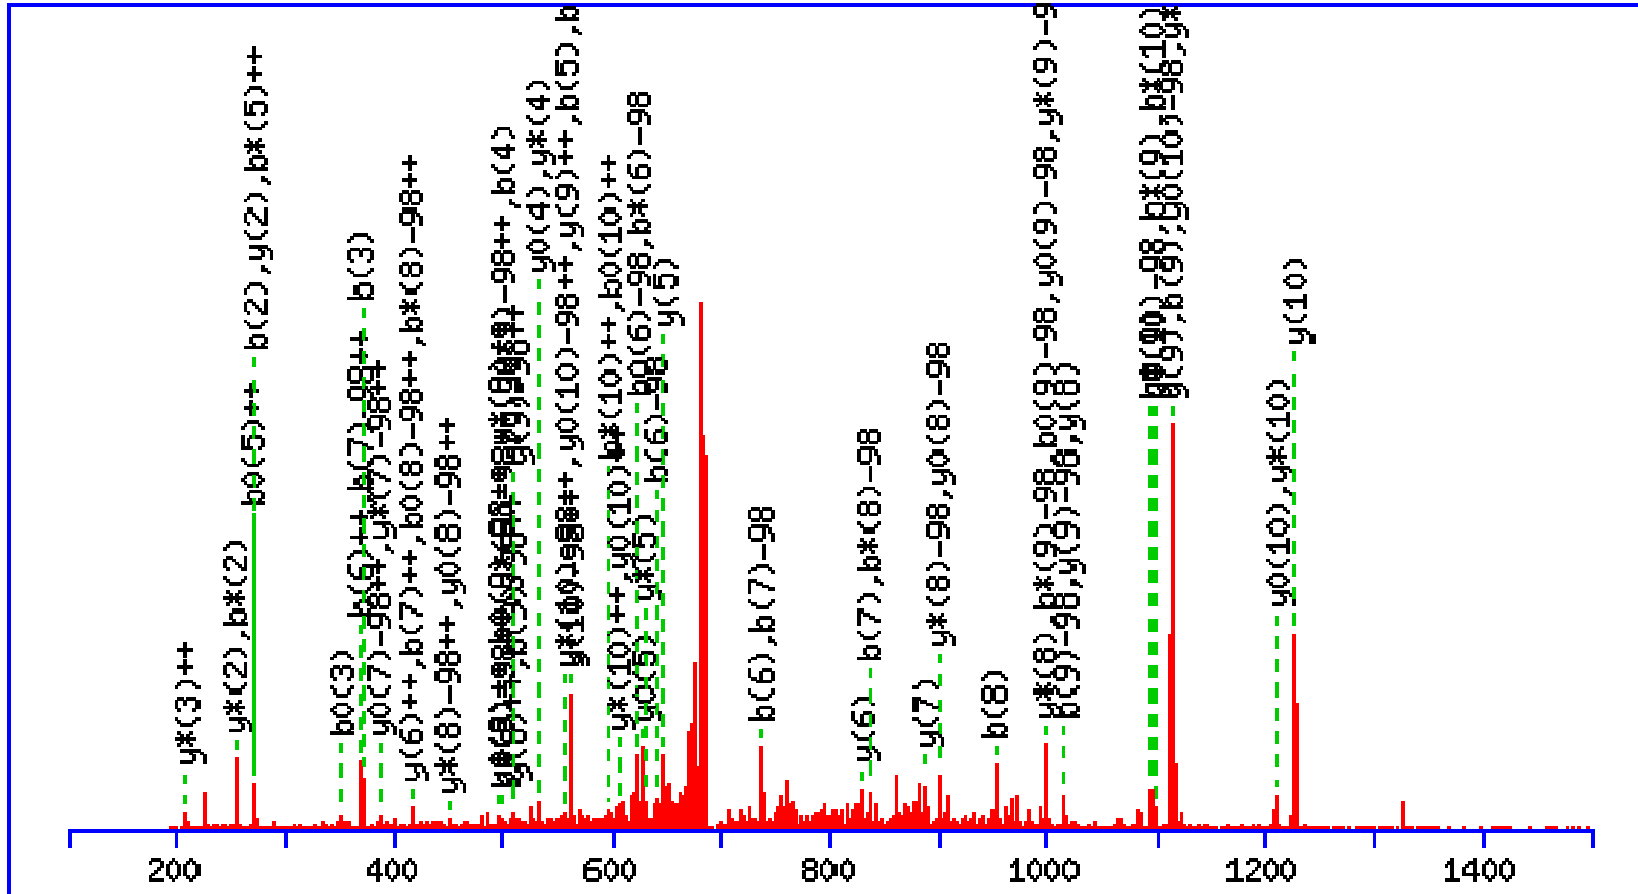

Supplement: NIHMS146258-supplement-2_si_002.pdf [file NIHMS146258-supplement-2_si_002.pdf]
